# Supplementary material for: Adherent cell depletion promotes the expansion of renal cell carcinoma infiltrating T cells with optimal characteristics for adoptive transfer
Source: PubMed Central journal article supplement — J Immunother Cancer. 2020 Oct 9;8(2):e000706. doi: 10.1136/jitc-2020-000706 (PMC7549459; doi:10.1136/jitc-2020-000706), 2020-10-09

# Supplemental Table 1 – Summary of RCC Patient Characteristics

| BSR ID | RCC # | Age at Date of Surgery | Gender | Race/Ethnicity                | Histologic Classification                    | Grade       | TNM Stage          | T1 Generation Successful by Paving? | Clinical Notes                                                                                                                                                                                                                             | Research Notes                                                                                                                  |
|--------|-------|------------------------|--------|-------------------------------|----------------------------------------------|-------------|--------------------|-------------------------------------|--------------------------------------------------------------------------------------------------------------------------------------------------------------------------------------------------------------------------------------------|---------------------------------------------------------------------------------------------------------------------------------|
| 29299  | 1     | 66                     | Male   | White/Not Hispanic or Latino  | clear cell RCC                               | G4          | pT1aM0N0/A         | N/A                                 |                                                                                                                                                                                                                                            | Establishment of Tumor Digestion Protocol and Adherent Tumor Cell Culture                                                       |
| 29321  | 2     | 61                     | Male   | White/Not Hispanic or Latino  | clear cell RCC                               | G4          | pT3a NO M0N/A      | N/A                                 | Sarcomatoid Features (30%)                                                                                                                                                                                                                 | Establishment of Tumor Digestion Protocol and Adherent Tumor Cell Culture                                                       |
| 29359  | 3     | 57                     | Male   | Cislat/Not Hispanic or Latino | clear cell Papillary RCC                     | G1          | pT1aM0M0/A         | N/A                                 |                                                                                                                                                                                                                                            | Establishment of Tumor Digestion Protocol and Adherent Tumor Cell Culture                                                       |
| 29370  | 4     | 74                     | Female | White/Not Hispanic or Latino  | clear cell RCC                               | G3          | pT3aM0M0/A         | N/A                                 |                                                                                                                                                                                                                                            | Establishment of Tumor Digestion Protocol and Adherent Tumor Cell Culture                                                       |
| 29721  | 5     | 70                     | Female | White/Not Hispanic or Latino  | clear cell RCC                               | G2          | pT3aM0M0N/A        | N/A                                 |                                                                                                                                                                                                                                            | Establishment of Tumor Digestion Protocol and Adherent Tumor Cell Culture                                                       |
| 29446  | 6     | 59                     | Male   | White/Not Hispanic or Latino  | Chromophobe RCC                              | N/A         | pT3aM0M0/A         | N/A                                 |                                                                                                                                                                                                                                            | Establishment of Tumor Digestion Protocol and Adherent Tumor Cell Culture                                                       |
| 29712  | 7     | 82                     | Male   | White/Not Hispanic or Latino  | clear cell RCC                               | G2          | pT3aM0M0N/A        | N/A                                 |                                                                                                                                                                                                                                            | Establishment of Tumor Digestion Protocol and Adherent Tumor Cell Culture                                                       |
| 29722  | 8     | 67                     | Male   | White/Not Hispanic or Latino  | clear cell RCC                               | G2          | pT3aM0M0/A         | N/A                                 |                                                                                                                                                                                                                                            | Establishment of Tumor Digestion Protocol and Adherent Tumor Cell Culture                                                       |
| 29821  | 9     | 43                     | Female | White/Not Hispanic or Latino  | clear cell RCC                               | G2          | pT3a NO M0N/A      | N/A                                 |                                                                                                                                                                                                                                            | Establishment of Tumor Digestion Protocol and Adherent Tumor Cell Culture                                                       |
| 29858  | 10    | 66                     | Male   | White/Not Hispanic or Latino  | clear cell RCC                               | G4          | pT3a NO M0N/A      | N/A                                 |                                                                                                                                                                                                                                            | Validation of Adherent Cell Culture via NGS sequencing                                                                          |
| 29096  | 11    | 54                     | Female | Hispanic or Latino            | clear cell RCC                               | G2          | pT3a NO M0N/A      | N/A                                 |                                                                                                                                                                                                                                            | Validation of Adherent Cell Culture via NGS sequencing                                                                          |
| 30000  | 12    | 53                     | Male   | White/Not Hispanic or Latino  | clear cell RCC                               | G2          | pT3a NO M0N/A      | N/A                                 |                                                                                                                                                                                                                                            | Validation of Adherent Cell Culture via NGS sequencing                                                                          |
| 29651  | 13    | 70                     | Male   | White/Not Hispanic or Latino  | clear cell RCC                               | G3          | pT3a N0 M1         | N/A                                 |                                                                                                                                                                                                                                            | Method Development for T1 Expansion                                                                                             |
| 29665  | 14    | 60                     | Male   | White/Not Hispanic or Latino  | clear cell RCC                               | G3          | pT1d N0 M0N/A      | N/A                                 |                                                                                                                                                                                                                                            | Method Development for T1 Expansion                                                                                             |
| 24774  | 15    | 62                     | Male   | White/Not Hispanic or Latino  | invasive high grade urothelial carcinoma     | Low Grade   | pT4 N1 M0N/A       | N/A                                 |                                                                                                                                                                                                                                            | Method Development for T1 Expansion                                                                                             |
| 28281  | 16    | 57                     | Male   | White/Not Hispanic or Latino  | clear cell RCC                               | G2          | pT2aM0M0N/A        | N/A                                 |                                                                                                                                                                                                                                            | Method Development for T1 Expansion                                                                                             |
| 28369  | 17    | 70                     | Male   | White/Not Hispanic or Latino  | clear cell RCC                               | G2          | pT3a NO M0N/A      | N/A                                 |                                                                                                                                                                                                                                            | Method Development for T1 Expansion/ Characterization of Immunosuppressive Ligands (TCL1)                                       |
| 29623  | 18    | 70                     | Male   | White/Not Hispanic or Latino  | Papillary RCC                                | G4          | pT3aM0M0N/A        | N/A                                 |                                                                                                                                                                                                                                            | Method Development for T1 Expansion                                                                                             |
| 28382  | 19    | 82                     | Male   | White/Not Hispanic or Latino  | clear cell RCC                               | G2          | pT3aM0M0/A         | N/A                                 |                                                                                                                                                                                                                                            | Method Development for T1 Expansion                                                                                             |
| 28383  | 20    | 57                     | Male   | White/Not Hispanic or Latino  | Papillary RCC                                | G3          | pT3aM0M0/A         | N/A                                 |                                                                                                                                                                                                                                            | Method Development for T1 Expansion                                                                                             |
| 28912  | 21    | 43                     | Male   | White/Not Hispanic or Latino  | Hemorrhagic Cyst w/ benign epithelial lining | N/A         | N/A                | N/A                                 |                                                                                                                                                                                                                                            | Method Development for T1 Expansion                                                                                             |
| 24862  | 22    | 68                     | Male   | Hispanic or Latino            | Papillary RCC                                | G1          | pT1aM0M0N/A        | N/A                                 |                                                                                                                                                                                                                                            | Method Development for T1 Expansion                                                                                             |
| 28496  | 23    | 62                     | Male   | Hispanic or Latino            | clear cell RCC                               | G2          | pT3aM0M0N/A        | N/A                                 |                                                                                                                                                                                                                                            | Method Development for T1 Expansion                                                                                             |
| 24475  | 24    | 56                     | Female | White/Not Hispanic or Latino  | clear cell RCC                               | G2          | pT3aM0M0/A         | N/A                                 |                                                                                                                                                                                                                                            | Method Development for T1 Expansion                                                                                             |
| 28445  | 25    | 70                     | Male   | White/Not Hispanic or Latino  | clear cell RCC                               | G2          | pT1aM0M0N/A        | N/A                                 |                                                                                                                                                                                                                                            | Method Development for T1 Expansion                                                                                             |
| 28434  | 26    | 64                     | Male   | White/Not Hispanic or Latino  | Oncocytoma                                   | N/A         | N/A                | N/A                                 |                                                                                                                                                                                                                                            | Method Development for T1 Expansion                                                                                             |
| 24941  | 27    | 63                     | Male   | White/Not Hispanic or Latino  | Papillary RCC                                | G3          | pT3Nx              | N/A                                 |                                                                                                                                                                                                                                            | Method Development for T1 Expansion                                                                                             |
| 24951  | 28    | 52                     | Male   | White/Not Hispanic or Latino  | clear cell RCC                               | G1          | pT1aMx             | N/A                                 |                                                                                                                                                                                                                                            | Method Development for T1 Expansion                                                                                             |
| 28484  | 29    | 69                     | Male   | White/Not Hispanic or Latino  | clear cell RCC                               | G4          | pT3a NO M0N/A      | N/A                                 |                                                                                                                                                                                                                                            | Method Development for T1 Expansion                                                                                             |
| 28486  | 30    | 44                     | Female | White/Not Hispanic or Latino  | clear cell RCC                               | G2          | pT3aM0M0N/A        | N/A                                 |                                                                                                                                                                                                                                            | Method Development for T1 Expansion                                                                                             |
| 28544  | 31    | 62                     | Male   | White/Not Hispanic or Latino  | Papillary RCC                                | G2          | pT3aM0M0N/A        | N/A                                 |                                                                                                                                                                                                                                            | Method Development for T1 Expansion                                                                                             |
| 28564  | 32    | 40                     | Female | White/Not Hispanic or Latino  | clear cell RCC                               | G2          | pT1aM0M0N/A        | N/A                                 |                                                                                                                                                                                                                                            | Method Development for T1 Expansion                                                                                             |
| 28609  | 33    | 88                     | Female | White/Not Hispanic or Latino  | clear cell RCC                               | G2          | pT1aM0M0N/A        | N/A                                 |                                                                                                                                                                                                                                            | Method Development for T1 Expansion                                                                                             |
| 28614  | 34    | 59                     | Male   | White/Not Hispanic or Latino  | clear cell RCC                               | G2          | pT3aM0M0N/A        | N/A                                 |                                                                                                                                                                                                                                            | Method Development for T1 Expansion                                                                                             |
| 28624  | 35    | 61                     | Female | Black or African American     | Papillary RCC                                | G2          | pT2aM0M0N/A        | N/A                                 |                                                                                                                                                                                                                                            | Method Development for T1 Expansion                                                                                             |
| 28651  | 36    | 47                     | Male   | White/Not Hispanic or Latino  | RCC, unclassified                            | G2          | mpT2bM0M0N/A       | N/A                                 |                                                                                                                                                                                                                                            | Method Development for T1 Expansion                                                                                             |
| 28573  | 37    | 50                     | Male   | White/Not Hispanic or Latino  | clear cell RCC                               | G3          | pT3aM0M0N/A        | N/A                                 |                                                                                                                                                                                                                                            | Method Development for T1 Expansion                                                                                             |
| 30019  | 38    | 44                     | Female | White/Not Hispanic or Latino  | clear cell RCC                               | G2          | pT3a NO M0N/A      | N/A                                 |                                                                                                                                                                                                                                            | Method Development for T1 Expansion                                                                                             |
| 30034  | 39    | 61                     | Male   | White/Not Hispanic or Latino  | clear cell RCC                               | G1          | pT1aM0M0N/A        | N/A                                 |                                                                                                                                                                                                                                            | Method Development for T1 Expansion / PreExpansion Characterization                                                             |
| 31597  | 40    | 46                     | Male   | White/Not Hispanic or Latino  | clear cell RCC                               | G2          | pT1aM0M0N/A        | N/A                                 |                                                                                                                                                                                                                                            | Method Development for T1 Expansion                                                                                             |
| 31249  | 41    | 61                     | Male   | White/Not Hispanic or Latino  | clear cell RCC                               | G3          | pT3a N0 M0N/A      | N/A                                 |                                                                                                                                                                                                                                            | Method Development for T1 Expansion / PreExpansion Characterization                                                             |
| 31260  | 42    | 72                     | Female | White/Not Hispanic or Latino  | clear cell RCC                               | G4          | pT3a N1 (6/5)M1    | N/A                                 |                                                                                                                                                                                                                                            | Method Development for T1 Expansion / PreExpansion Characterization                                                             |
| 33261  | 43    | 58                     | Male   | Hispanic or Latino            | clear cell RCC                               | G3          | pT3a N0 M0N/A      | N/A                                 |                                                                                                                                                                                                                                            | Method Development for T1 Expansion / PreExpansion Characterization                                                             |
| 30998  | 44    | 62                     | Male   | White/Not Hispanic or Latino  | clear cell RCC                               | G2          | pT3aM0M0N/A        | N/A                                 |                                                                                                                                                                                                                                            | Method Development for T1 Expansion                                                                                             |
| 31028  | 45    | 71                     | Male   | White/Not Hispanic or Latino  | clear cell RCC                               | G4          | pT3a NO M1         | N/A                                 |                                                                                                                                                                                                                                            | Method Development for T1 Expansion / PreExpansion Characterization                                                             |
| 31032  | 46    | 65                     | Female | White/Not Hispanic or Latino  | clear cell RCC                               | G3          | pT3aM0M0N/A        | N/A                                 |                                                                                                                                                                                                                                            | Method Development for T1 Expansion                                                                                             |
| 31287  | 47    | 64                     | Male   | White/Not Hispanic or Latino  | Chromophobe RCC                              | N/A         | pT2aM0M0/A         | N/A                                 |                                                                                                                                                                                                                                            | Method Development for T1 Expansion                                                                                             |
| 31076  | 48    | 80                     | Male   | White/Not Hispanic or Latino  | Papillary RCC                                | G1          | pT2aMx             | N/A                                 |                                                                                                                                                                                                                                            | Method Development for T1 Expansion                                                                                             |
| 31110  | 49    | 58                     | Male   | White/Not Hispanic or Latino  | clear cell RCC                               | G3          | pT1aM0M0N/A        | N/A                                 |                                                                                                                                                                                                                                            | Method Development for T1 Expansion                                                                                             |
| 31324  | 50    | 59                     | Male   | Hispanic or Latino            | clear cell RCC                               | G2          | pT1aMx             | N/A                                 |                                                                                                                                                                                                                                            | Method Development for T1 Expansion                                                                                             |
| 31145  | 51    | 56                     | Female | White/Not Hispanic or Latino  | clear cell RCC                               | G3          | pT2a N0 M0N/A      | N/A                                 |                                                                                                                                                                                                                                            | Method Development for T1 Expansion / PreExpansion Characterization                                                             |
| 31277  | 52    | 55                     | Male   | White/Not Hispanic or Latino  | Clear Cell RCC                               | G2          | pT1d N0 M0N/A      | Yes                                 |                                                                                                                                                                                                                                            | Validation of Paving Protocol for T1 Expansion                                                                                  |
| 29096  | PreC3 | 61                     | Male   | White/Not Hispanic or Latino  | Clear Cell RCC                               | G2          | pT3a N0 M0N/A      | Yes                                 | Patient enrolled in Prospec RCC clinical trial - randomized to surgery alone arm                                                                                                                                                           | Validation of Paving Protocol for T1 Expansion                                                                                  |
| 33710  | 53    | 57                     | Female | White/Not Hispanic or Latino  | Clear Cell RCC                               | G2          | pT3a N0 M0N/A      | Yes                                 |                                                                                                                                                                                                                                            | Validation of Paving Protocol for T1 Expansion                                                                                  |
| 33750  | 54    | 58                     | Male   | White/Not Hispanic or Latino  | Clear Cell RCC                               | G2          | pT1d N0(0/5) M0N/A | Yes                                 |                                                                                                                                                                                                                                            | Validation of Paving Protocol for T1 Expansion / PreExpansion Characterization                                                  |
| 33792  | 56    | 60                     | Male   | White/Not Hispanic or Latino  | Clear Cell RCC                               | G2          | pT3b N0(0/10) M1   | Yes                                 | Two left lower lobe pulmonary nodules favored for metastases rather than noncalcified granulomas or other etiology on imaging                                                                                                              | Validation of Paving Protocol for T1 Expansion / PreExpansion Characterization                                                  |
| 33821  | 57    | 44                     | Female | White/Not Hispanic or Latino  | Clear Cell RCC                               | G2          | pT3a N0 M0N/A      | Yes                                 |                                                                                                                                                                                                                                            | Validation of Paving Protocol for T1 Expansion / Characterization of Immunosuppressive Ligands (TCL2)                           |
| 33836  | 58    | 69                     | Female | White/Not Hispanic or Latino  | Clear Cell RCC                               | G3          | pT3a N0 M0N/A      | No                                  |                                                                                                                                                                                                                                            | Validation of Paving Protocol for T1 Expansion                                                                                  |
| 33851  | 59    | 46                     | Female | White/Not Hispanic or Latino  | Chromophobe RCC                              | G3          | pT3a N0 M0N/A      | No                                  | Immunostain for CK7/CD117/CAIX supporting chromophobe subtype                                                                                                                                                                              | Validation of Paving Protocol for T1 Expansion                                                                                  |
| 33885  | 60    | 62                     | Female | White/Not Hispanic or Latino  | Clear Cell RCC                               | G2          | pT1d N0(0/9) M0N/A | Yes                                 |                                                                                                                                                                                                                                            | Validation of Paving Protocol for T1 Expansion                                                                                  |
| 33906  | 61    | 24                     | Male   | White/Not Hispanic or Latino  | Clear Cell RCC                               | G2          | pT1d N0(0/2) M0N/A | Yes                                 |                                                                                                                                                                                                                                            | Validation of Paving Protocol for T1 Expansion / PreExpansion Characterization                                                  |
| 33915  | 62    | 48                     | Male   | White/Not Hispanic or Latino  | Clear Cell RCC                               | G4          | pT3a N1(15/7) M1   | Yes                                 | Biopsy consistent with metastases to liver. Numerous pulmonary nodules and mediastinal lymphadenopathy noted on imaging. Sarcomatoid differentiation noted (30%). Immunostain for PAX8/CAIX/PanCK/VSAT3/ps63 supporting clear cell subtype | Validation of Paving Protocol for T1 Expansion                                                                                  |
| 33956  | 63    | 74                     | Female | White/Not Hispanic or Latino  | Papillary RCC                                | G2          | pT2b N0 M0N/A      | No                                  |                                                                                                                                                                                                                                            | Validation of Paving Protocol for T1 Expansion                                                                                  |
| 33965  | 64    | 79                     | Male   | White/Not Hispanic or Latino  | Clear Cell RCC                               | G2          | pT3a N0 M0N/A      | Yes                                 |                                                                                                                                                                                                                                            | Validation of Paving Protocol for T1 Expansion / PreExpansion Characterization                                                  |
| 35707  | 65    | 84                     | Male   | White/Not Hispanic or Latino  | Papillary RCC                                | G3          | pT2a N0 M0N/A      | No                                  |                                                                                                                                                                                                                                            | Validation of Paving Protocol for T1 Expansion                                                                                  |
| 35712  | 66    | 58                     | Female | White/Not Hispanic or Latino  | Clear Cell RCC                               | G2          | pT3a N0 M0N/A      | Yes                                 |                                                                                                                                                                                                                                            | Validation of Paving Protocol for T1 Expansion                                                                                  |
| 32147  | 67    | 75                     | Male   | White/Not Hispanic or Latino  | Clear Cell RCC                               | G2          | pT1d N0 M0N/A      | Yes                                 |                                                                                                                                                                                                                                            | Validation of Paving Protocol for T1 Expansion                                                                                  |
| 35769  | 68    | 64                     | Male   | White/Not Hispanic or Latino  | Clear Cell RCC                               | G4          | pT3a N0 M0N/A      | Yes                                 |                                                                                                                                                                                                                                            | Validation of Paving Protocol for T1 Expansion                                                                                  |
| 35808  | 69    | 53                     | Male   | White/Not Hispanic or Latino  | Clear Cell RCC                               | G4          | pT3a N0 M0N/A      | Yes                                 |                                                                                                                                                                                                                                            | Immunostain for PAX8/CAIX supporting clear cell subtype. High risk of recurrence due to G4, pT3, rhuboid features, and necrosis |
| 35862  | 70    | 53                     | Female | White/Not Hispanic or Latino  | Clear Cell RCC                               | G2          | pT3a N0 M0N/A      | Yes                                 |                                                                                                                                                                                                                                            | Validation of Paving Protocol for T1 Expansion                                                                                  |
| 35887  | 71    | 85                     | Male   | White/Not Hispanic or Latino  | Clear Cell RCC                               | G4          | pT3aM0M0N/A        | N/A                                 |                                                                                                                                                                                                                                            | Characterization of MDSG                                                                                                        |
| 35891  | 72    | 62                     | Male   | Asian                         | clear cell papillary RCC                     | G1          | pT1a               | N/A                                 |                                                                                                                                                                                                                                            | Characterization of immunosuppressive ligands (TCL3)                                                                            |
| 35934  | 74    | 49                     | Male   | White/Not Hispanic or Latino  | Metastatic Clear Cell RCC                    | Unavailable | Unavailable        | N/A                                 |                                                                                                                                                                                                                                            | Characterization of MDSG                                                                                                        |
| 35955  | 75    | 69                     | Male   | White/Not Hispanic or Latino  | Clear Cell RCC                               | G2          | pT1d N0 M0N/A      | N/A                                 |                                                                                                                                                                                                                                            | Characterization of MDSG                                                                                                        |

## Supplemental Table 2 – Mutation profile of adherent RCC TCLs

| <b>Gene</b>  | <b>RCC11</b> | <b>RCC12</b> | <b>RCC13</b>       |
|--------------|--------------|--------------|--------------------|
| <i>VHL</i>   | Val155Met    | Ser72fs      | His115Asn          |
| <i>PBRM1</i> | WT           | Ile97fs      | Asp419Gly          |
| <i>SETD2</i> | WT           | WT           | Lys1712_Ser1714del |
| <i>TP53</i>  | WT           | WT           | Leu330His          |

# Supplemental Figure 1 – Representative Gating Scheme

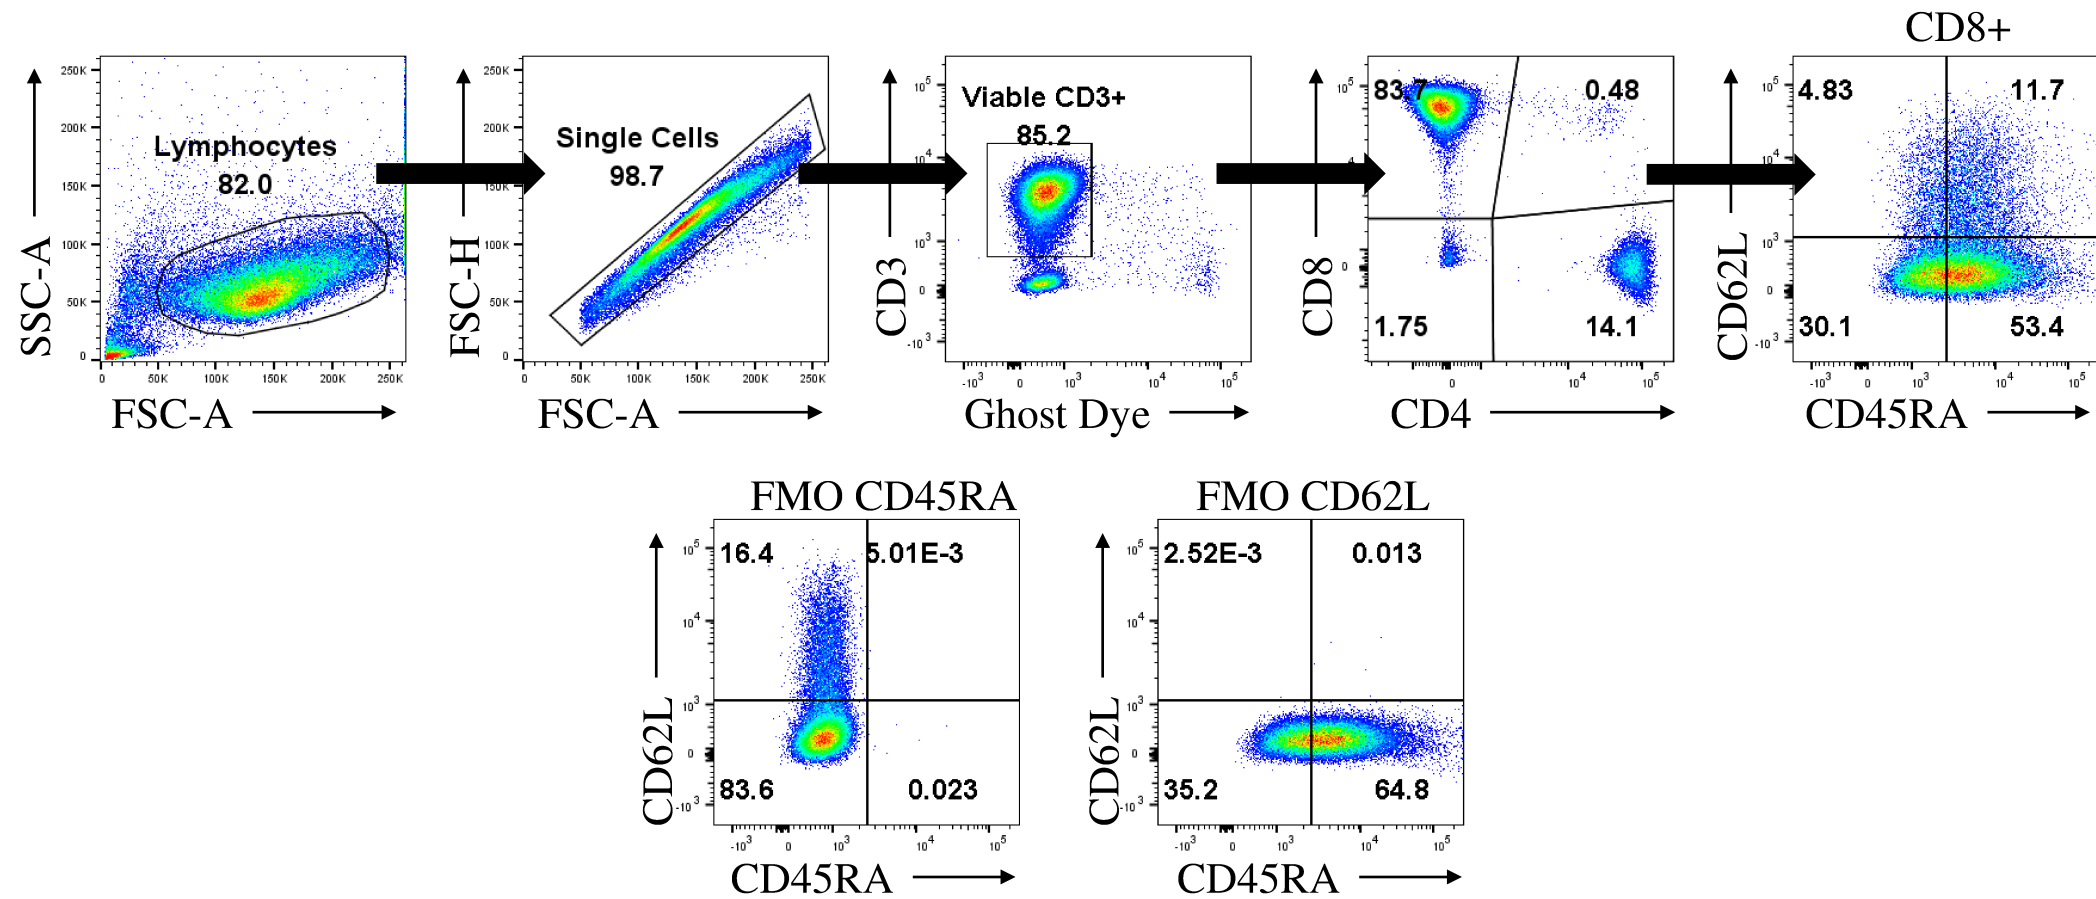

## Supplemental Figure 2

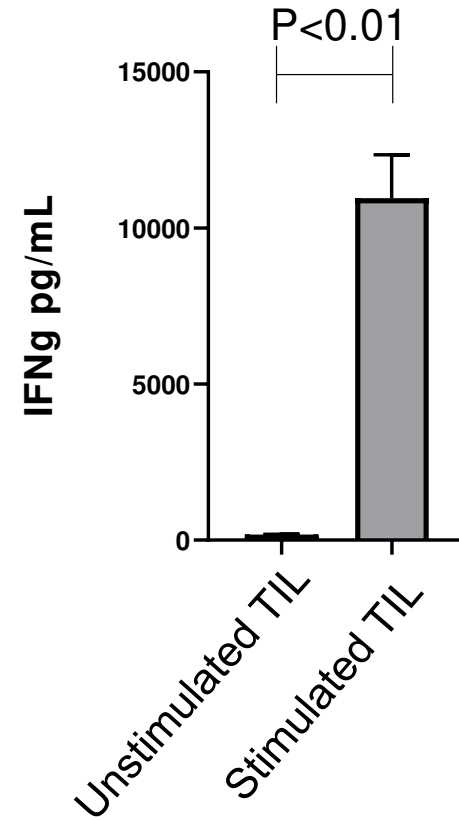



# Supplemental Figure 3

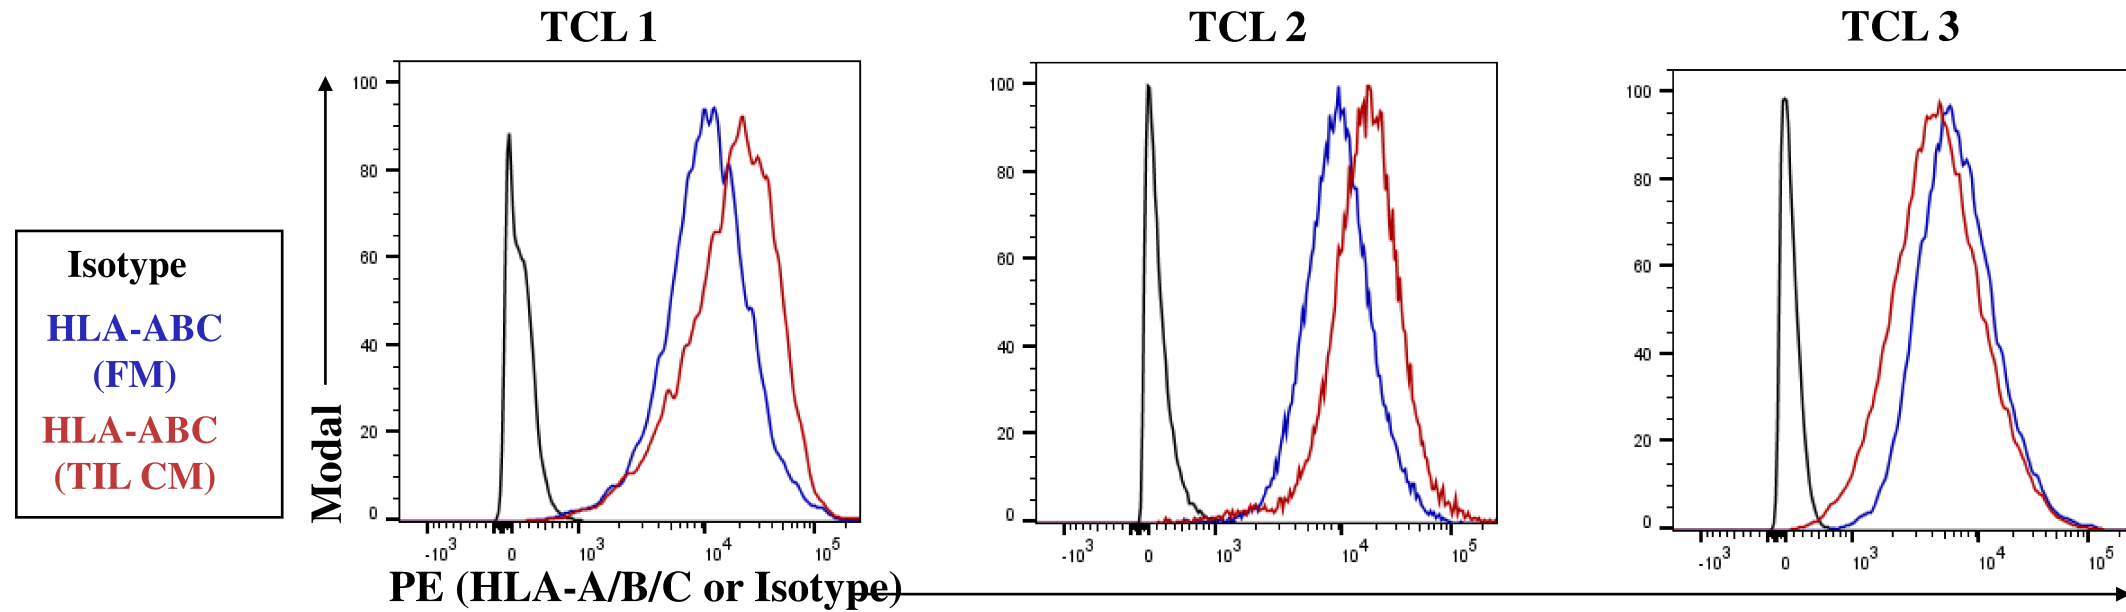

## Supplemental Figure 4

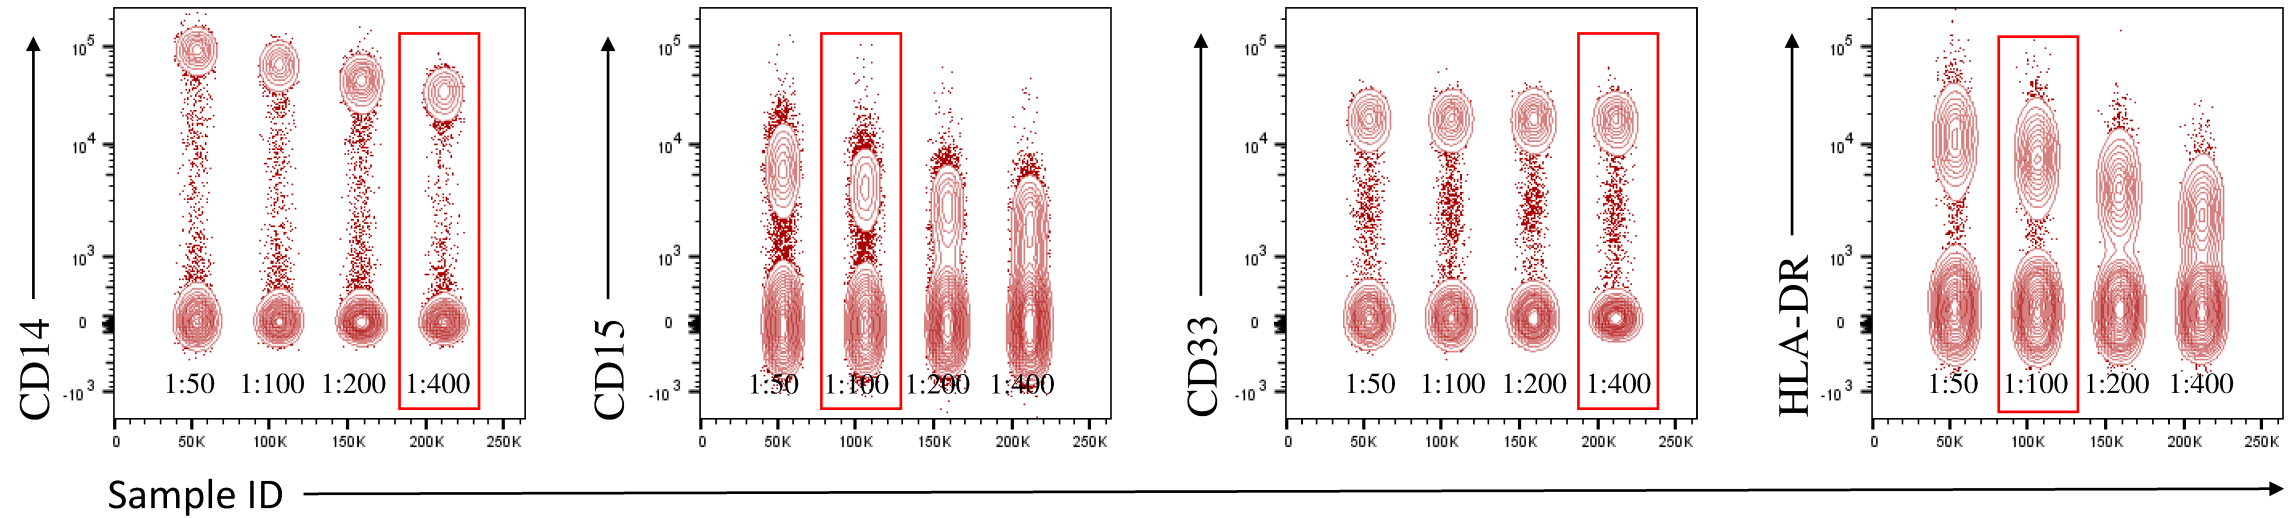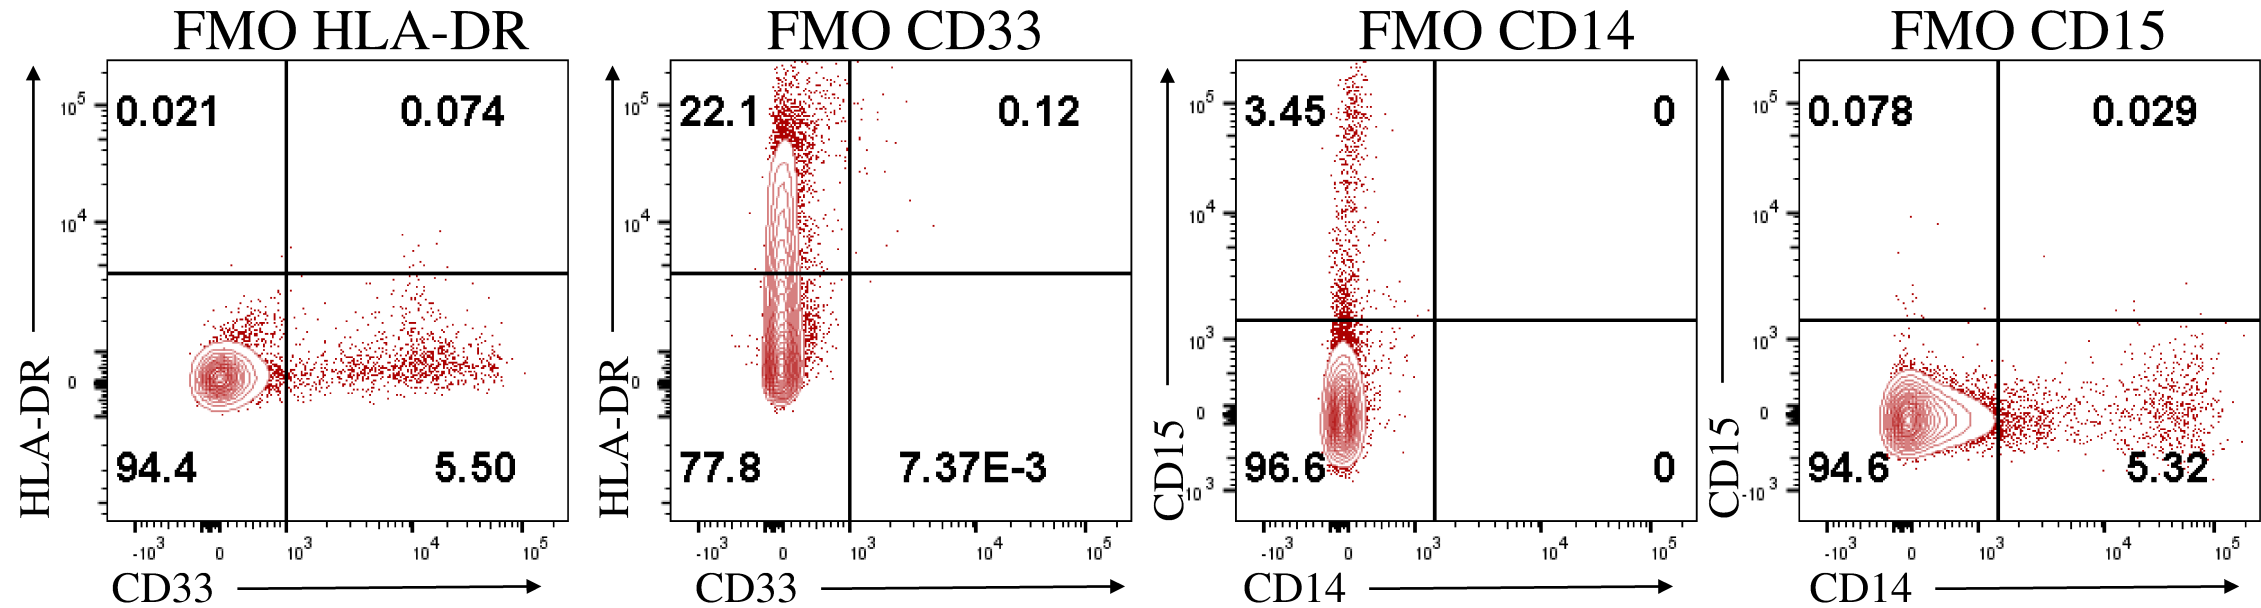

## Supplemental Figure 5

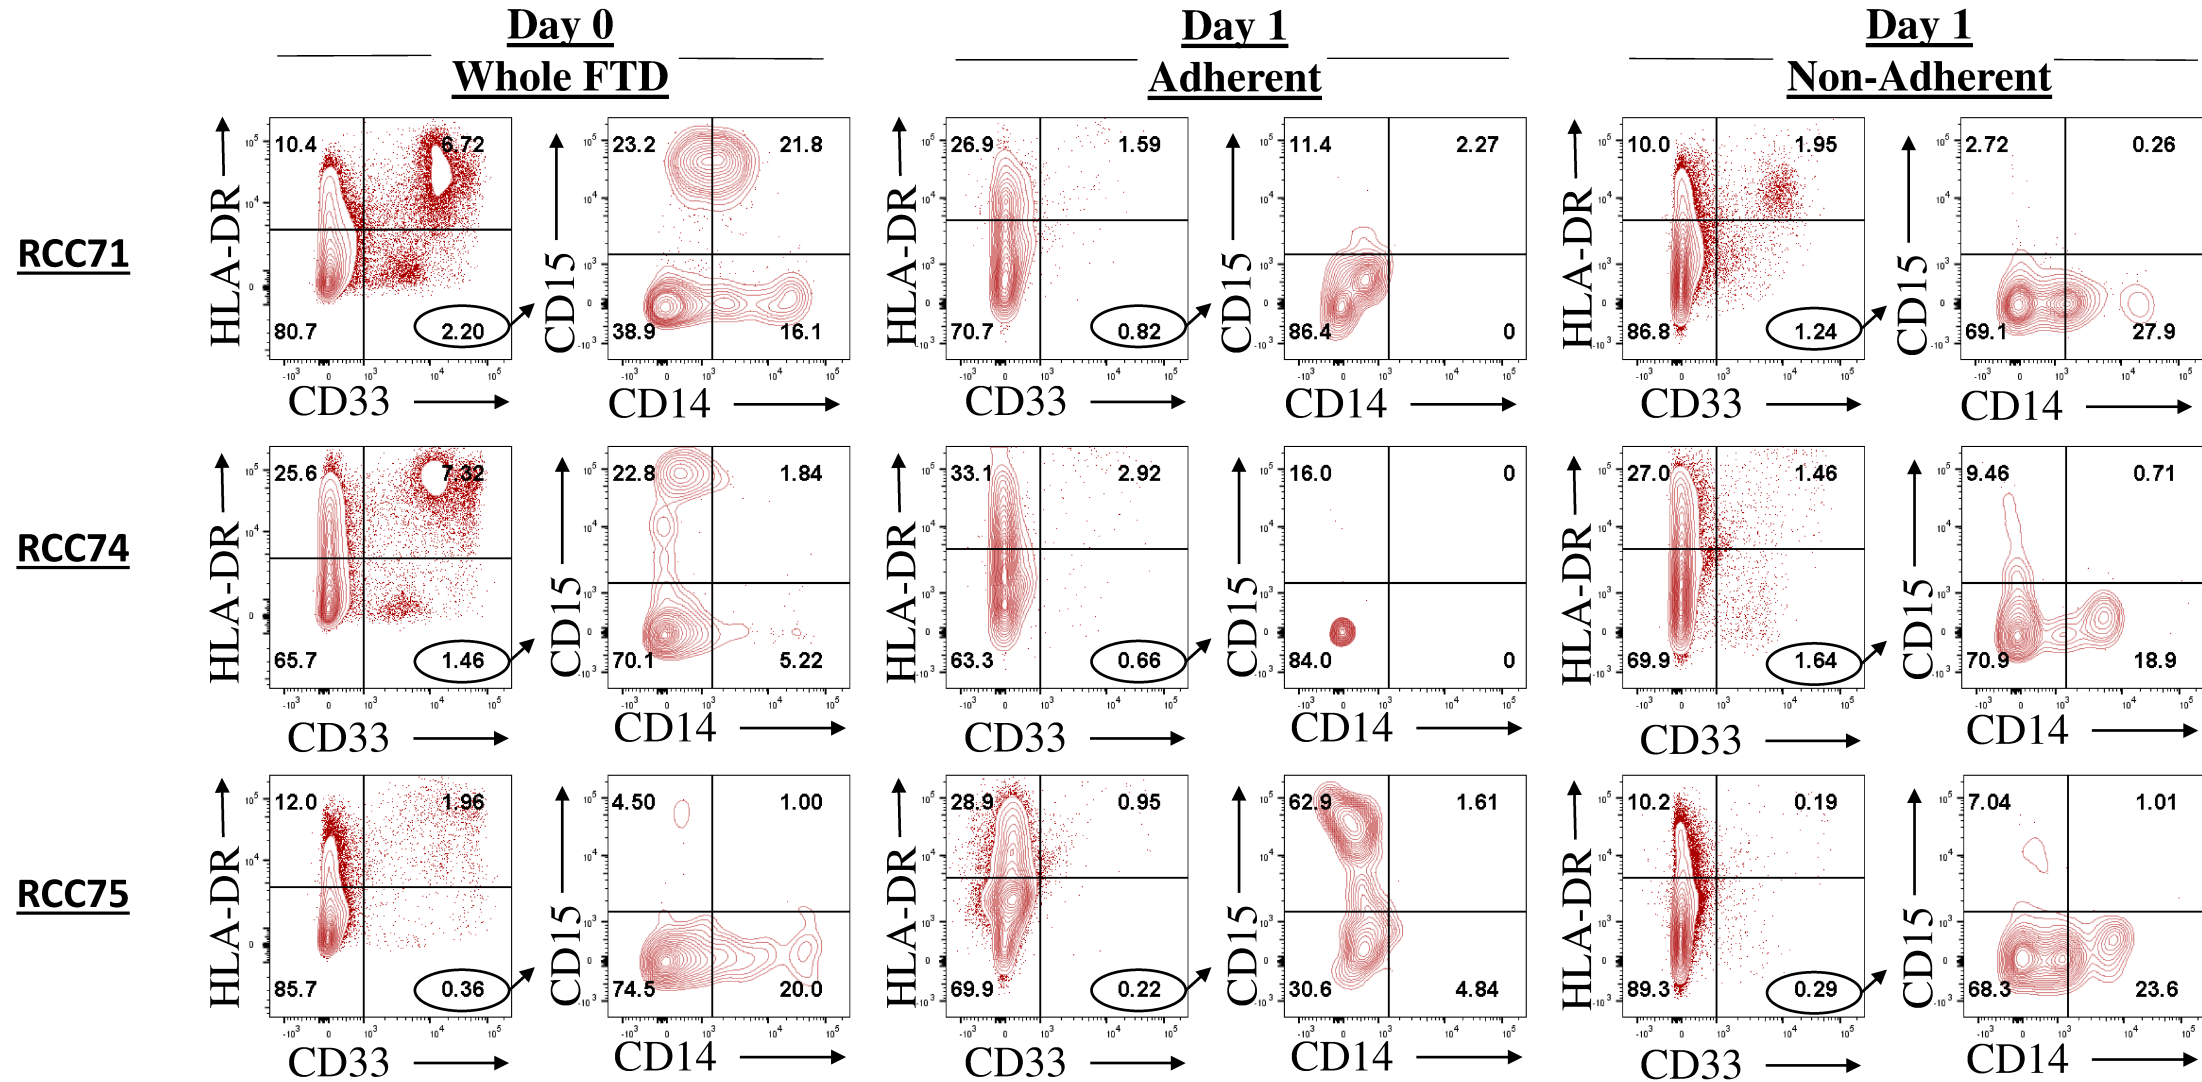

## Supplemental Figure 6

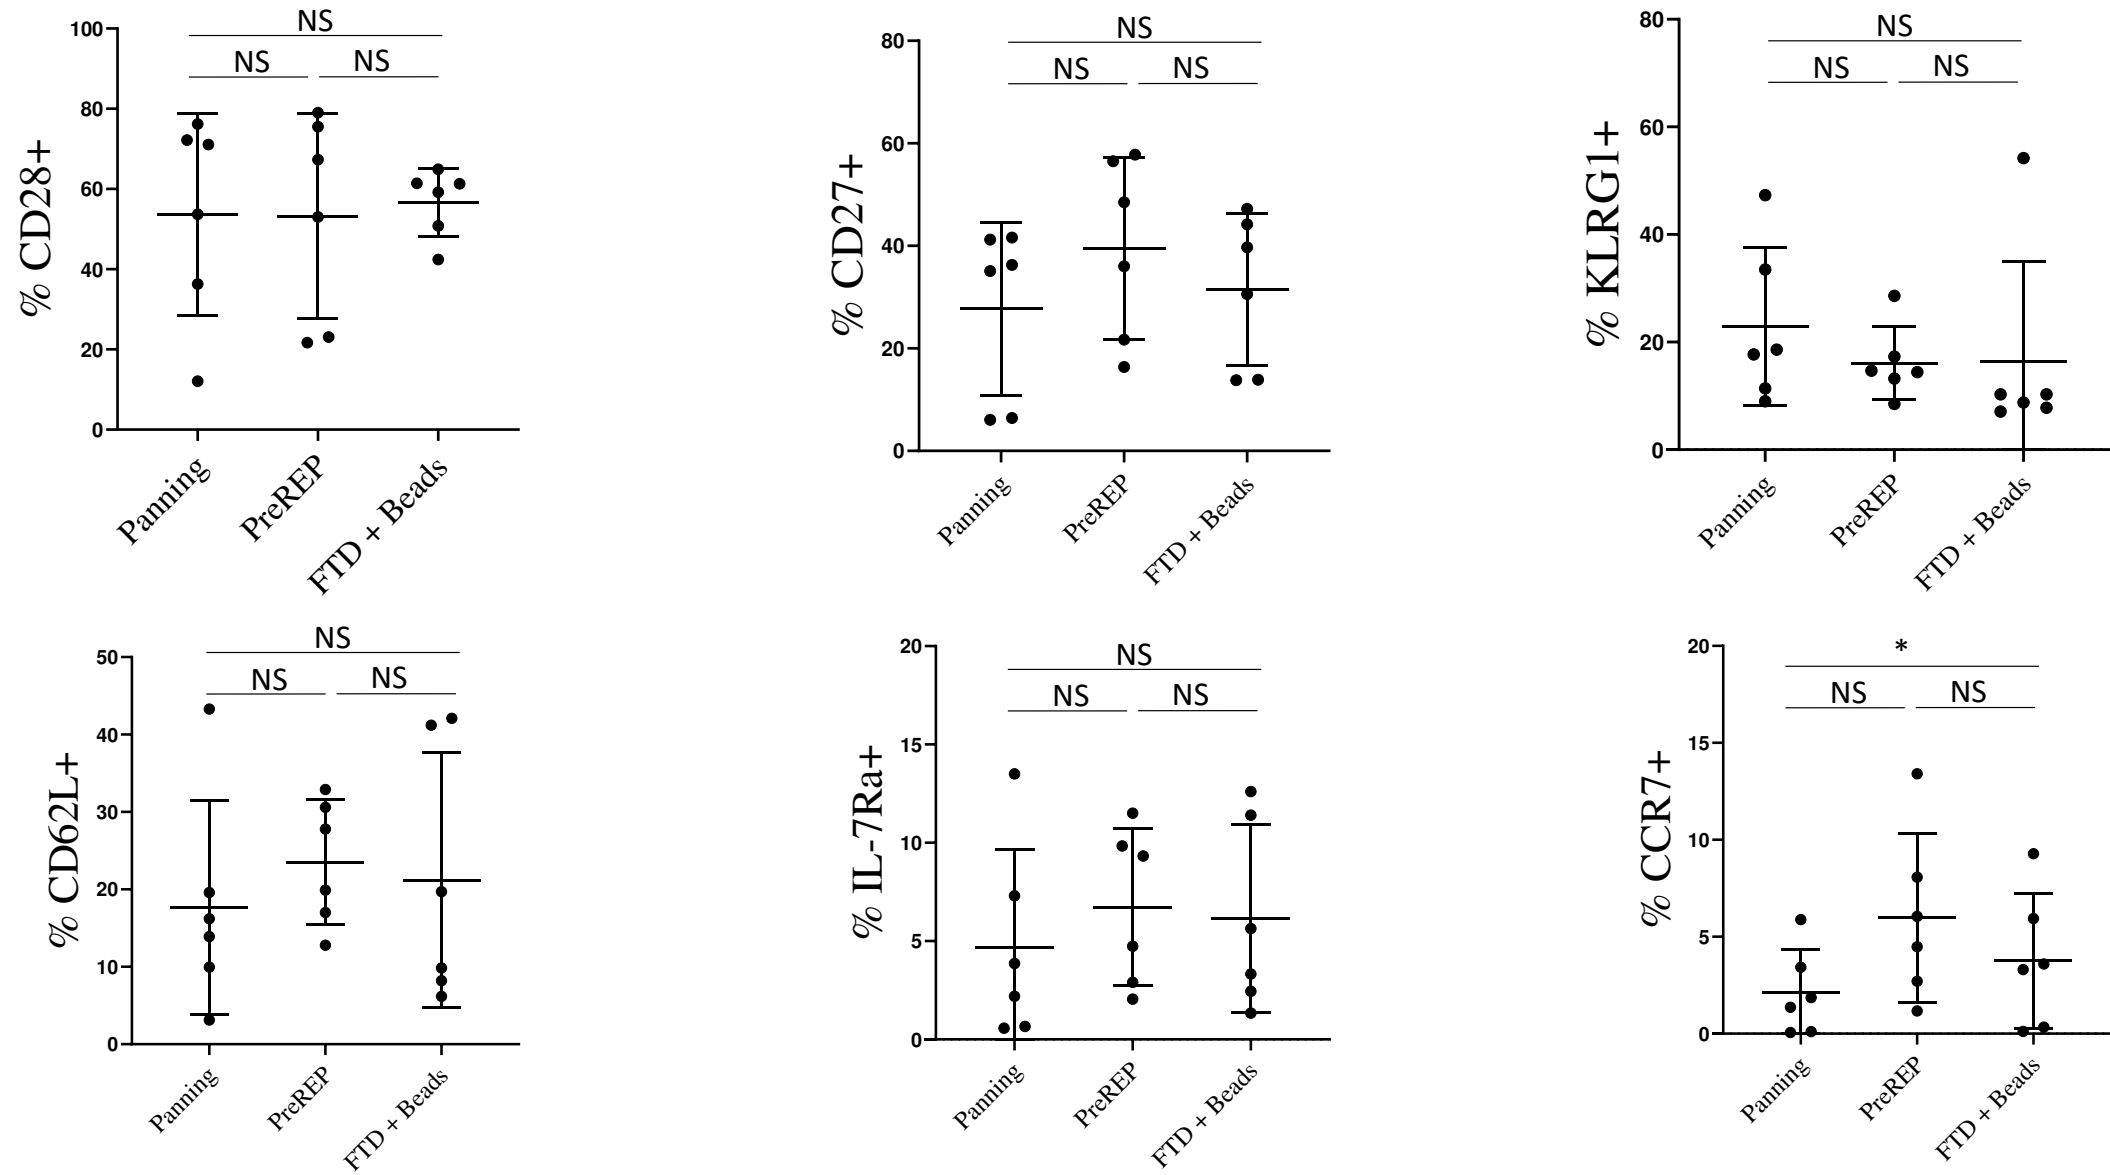

## Supplemental Figure 7 - RCC 57

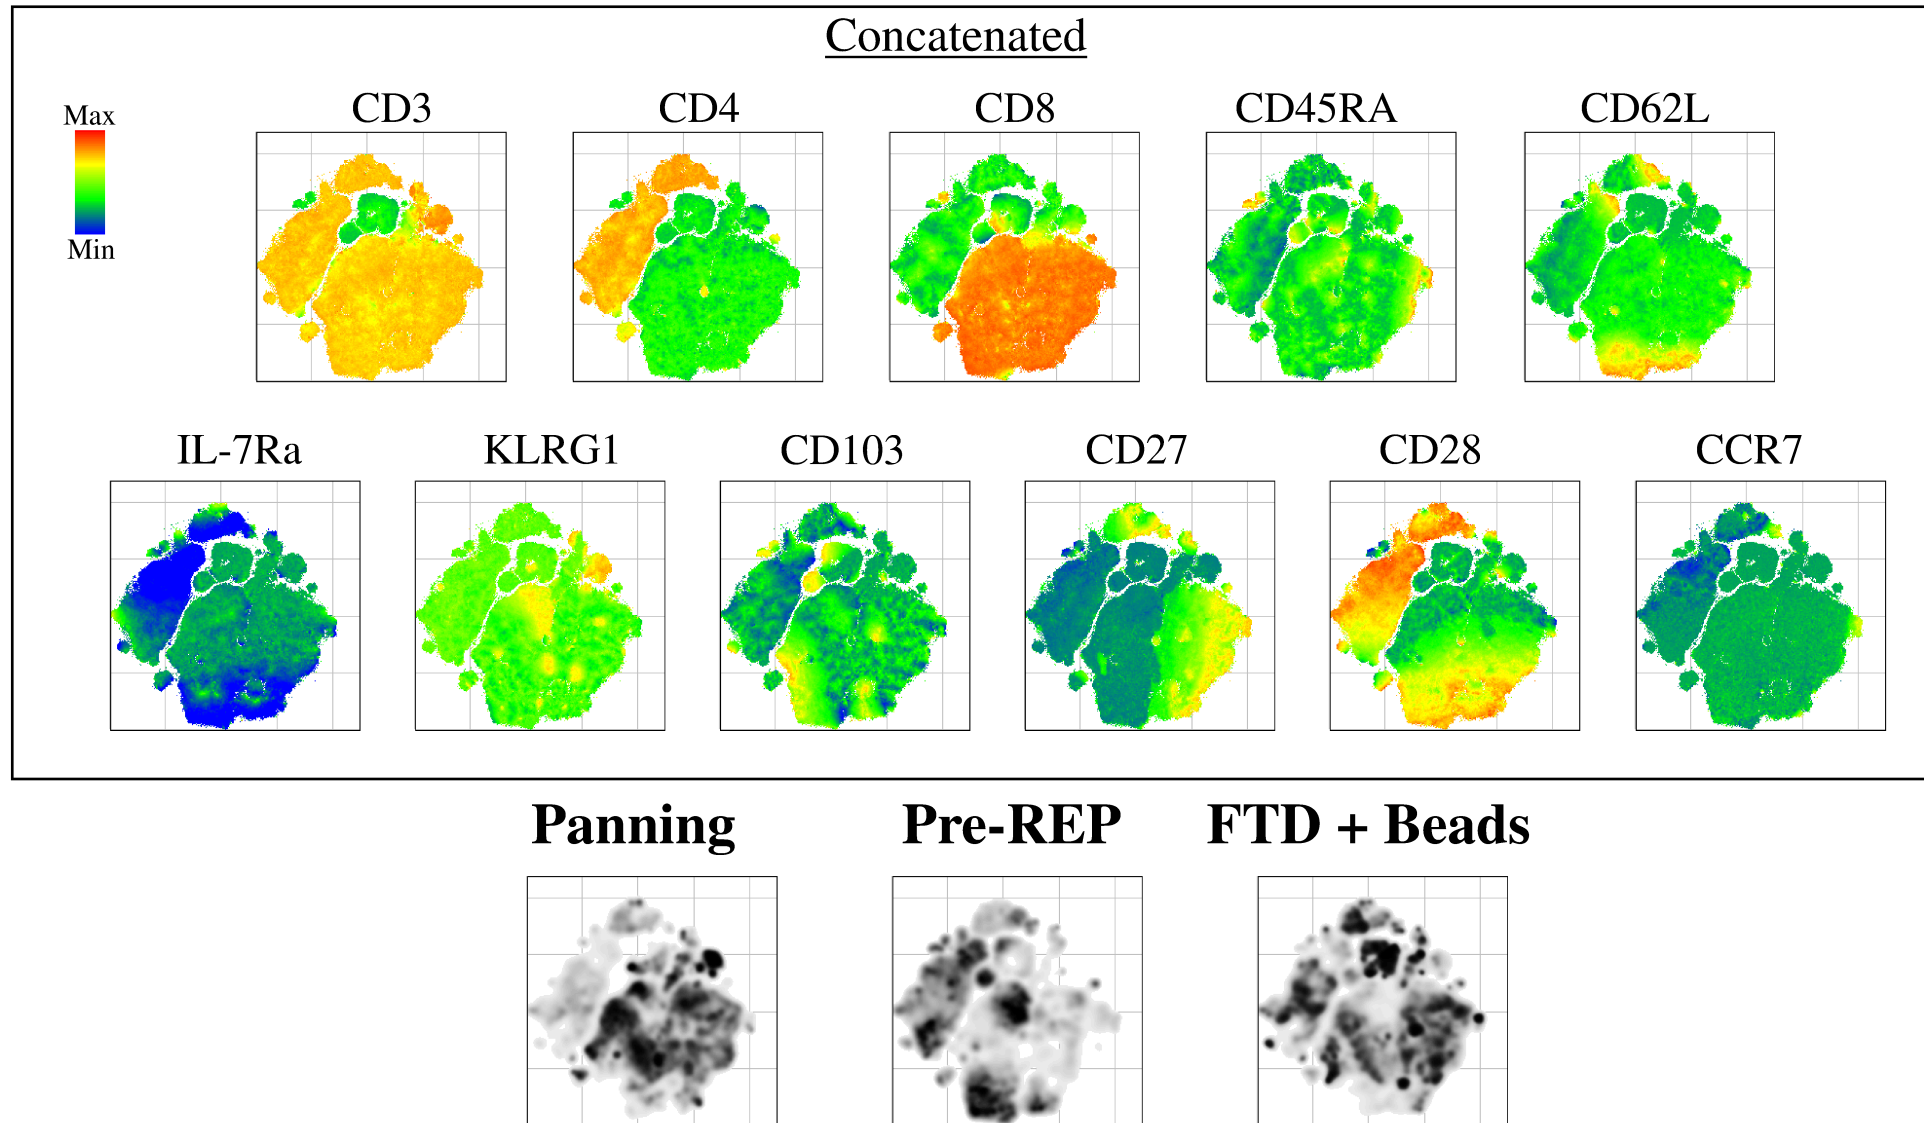

# Supplemental Figure 8 - RCC62

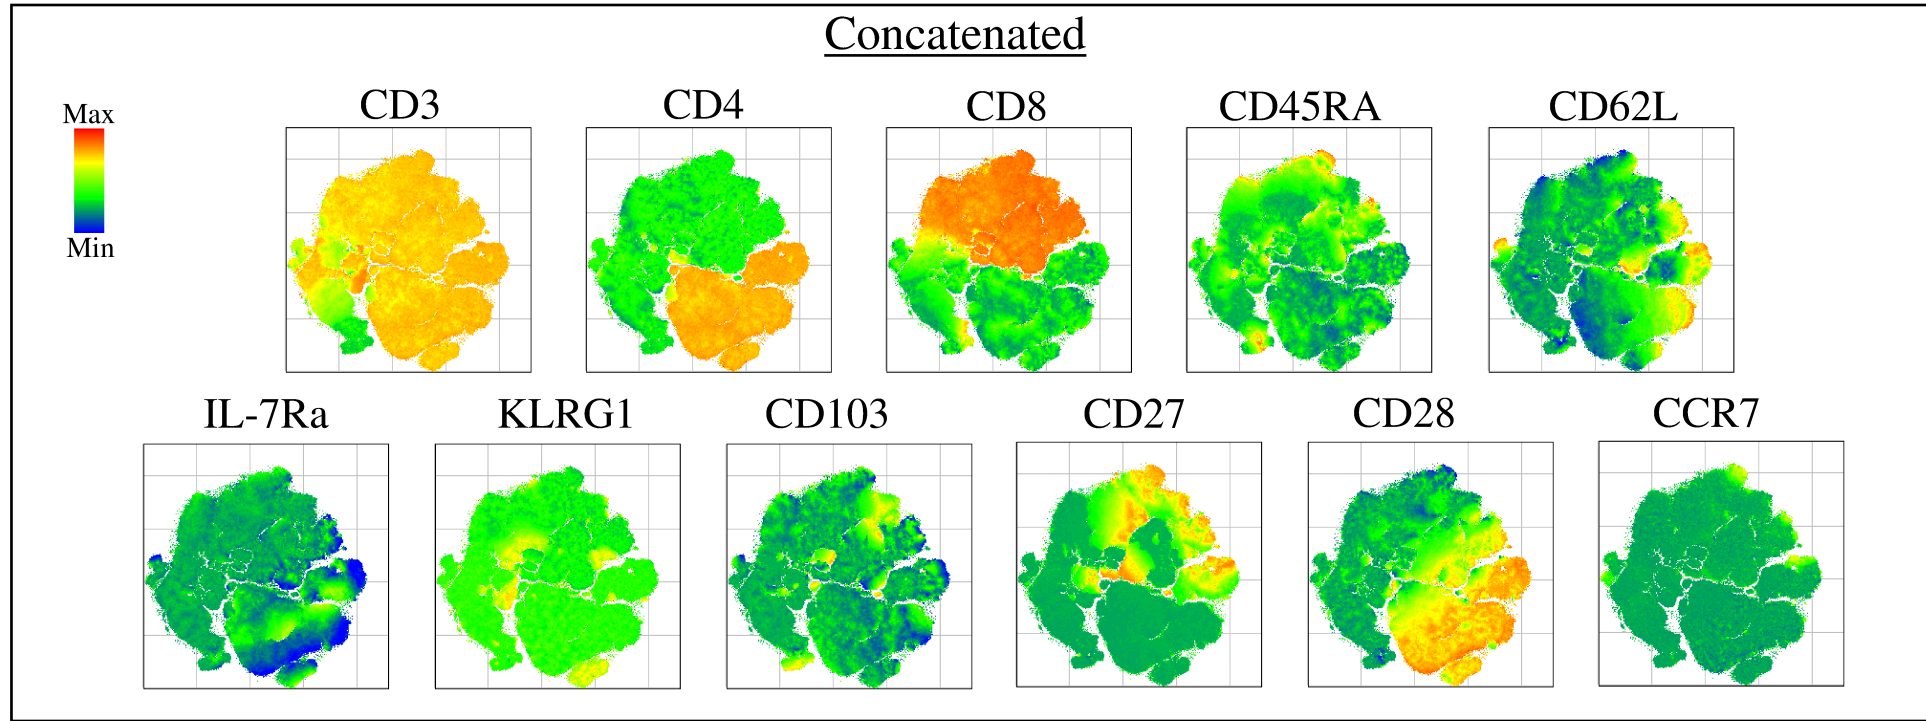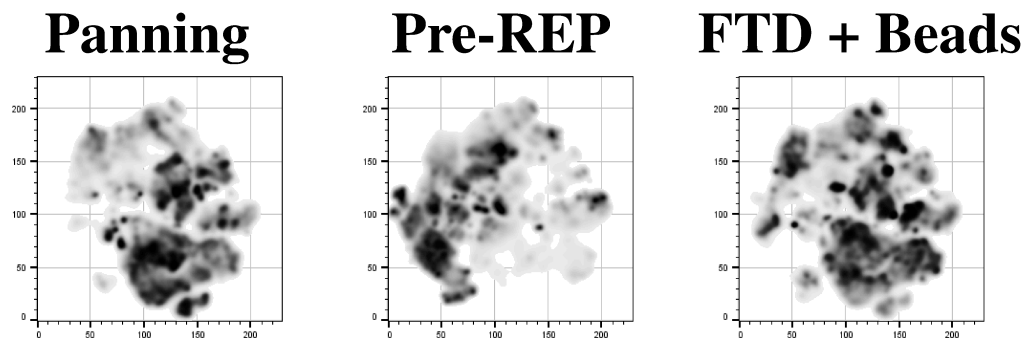



# Supplemental Figure 9 - RCC64

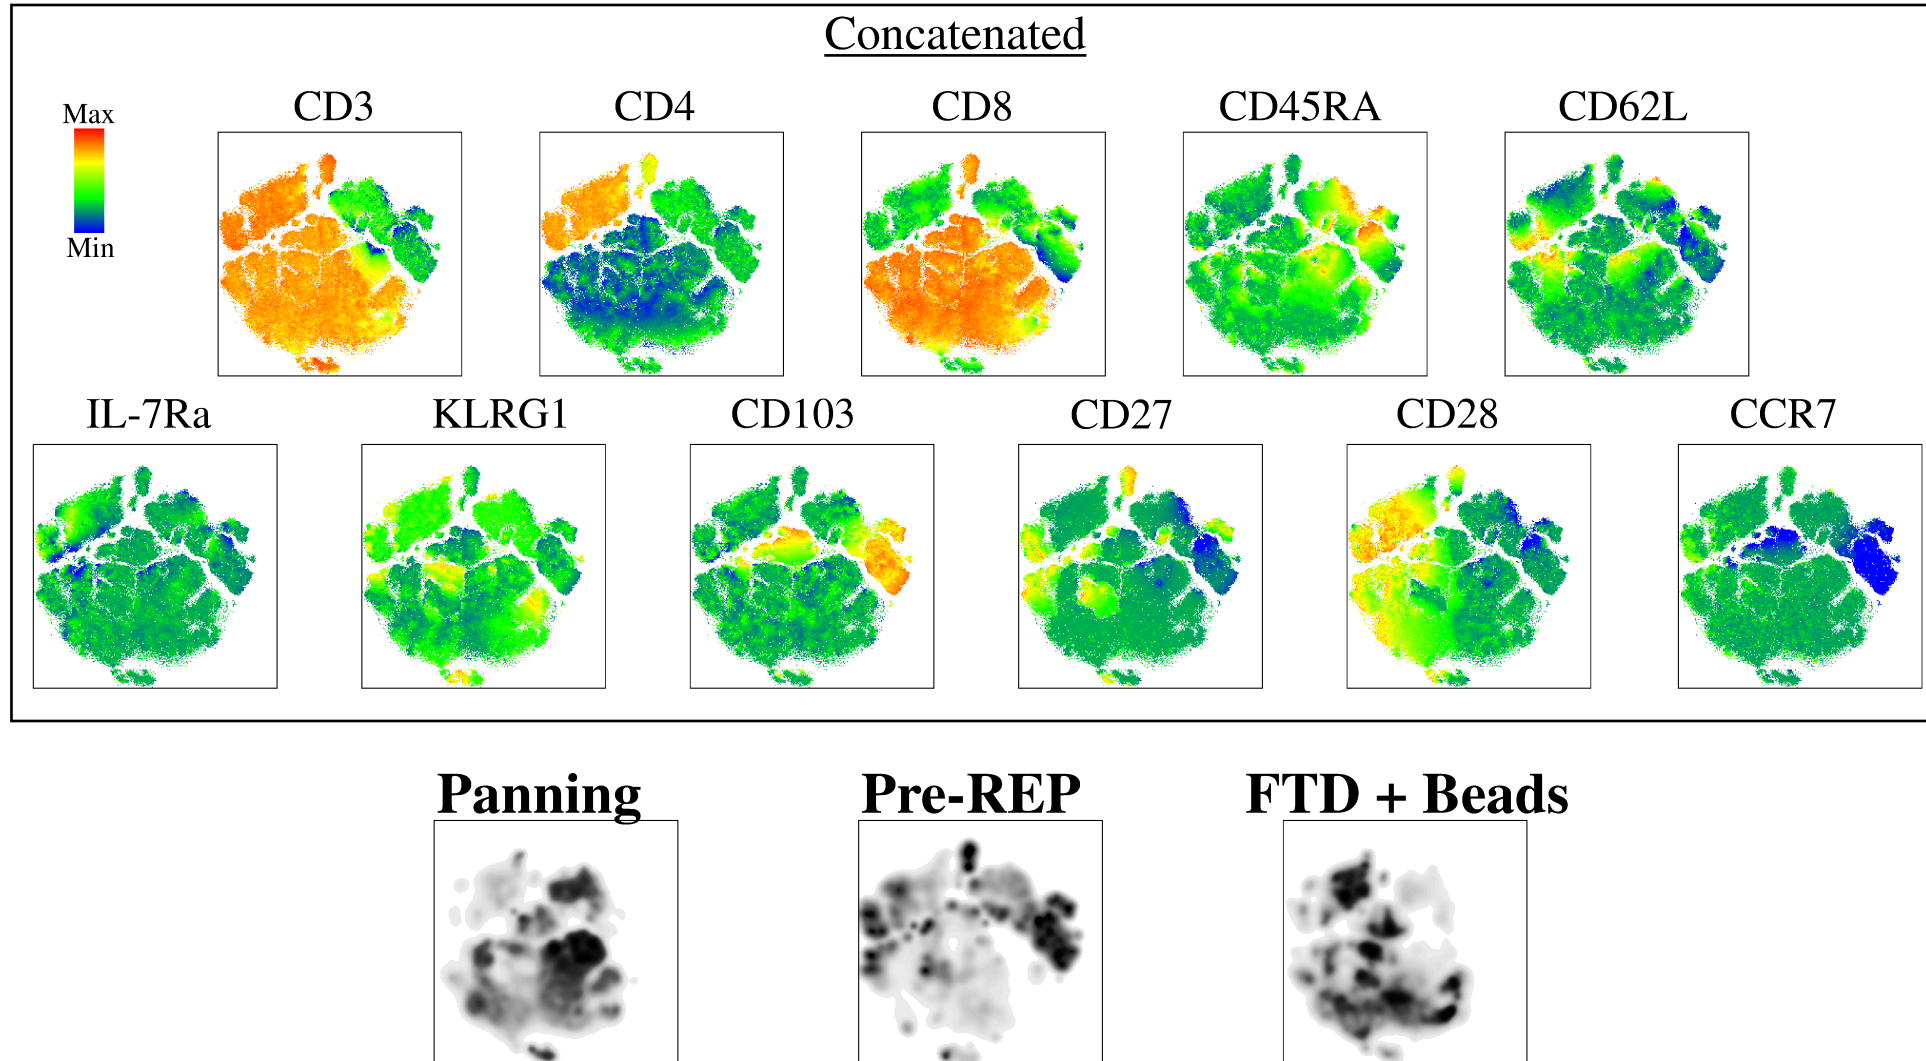

## Supplemental Figure 10 - RCC66

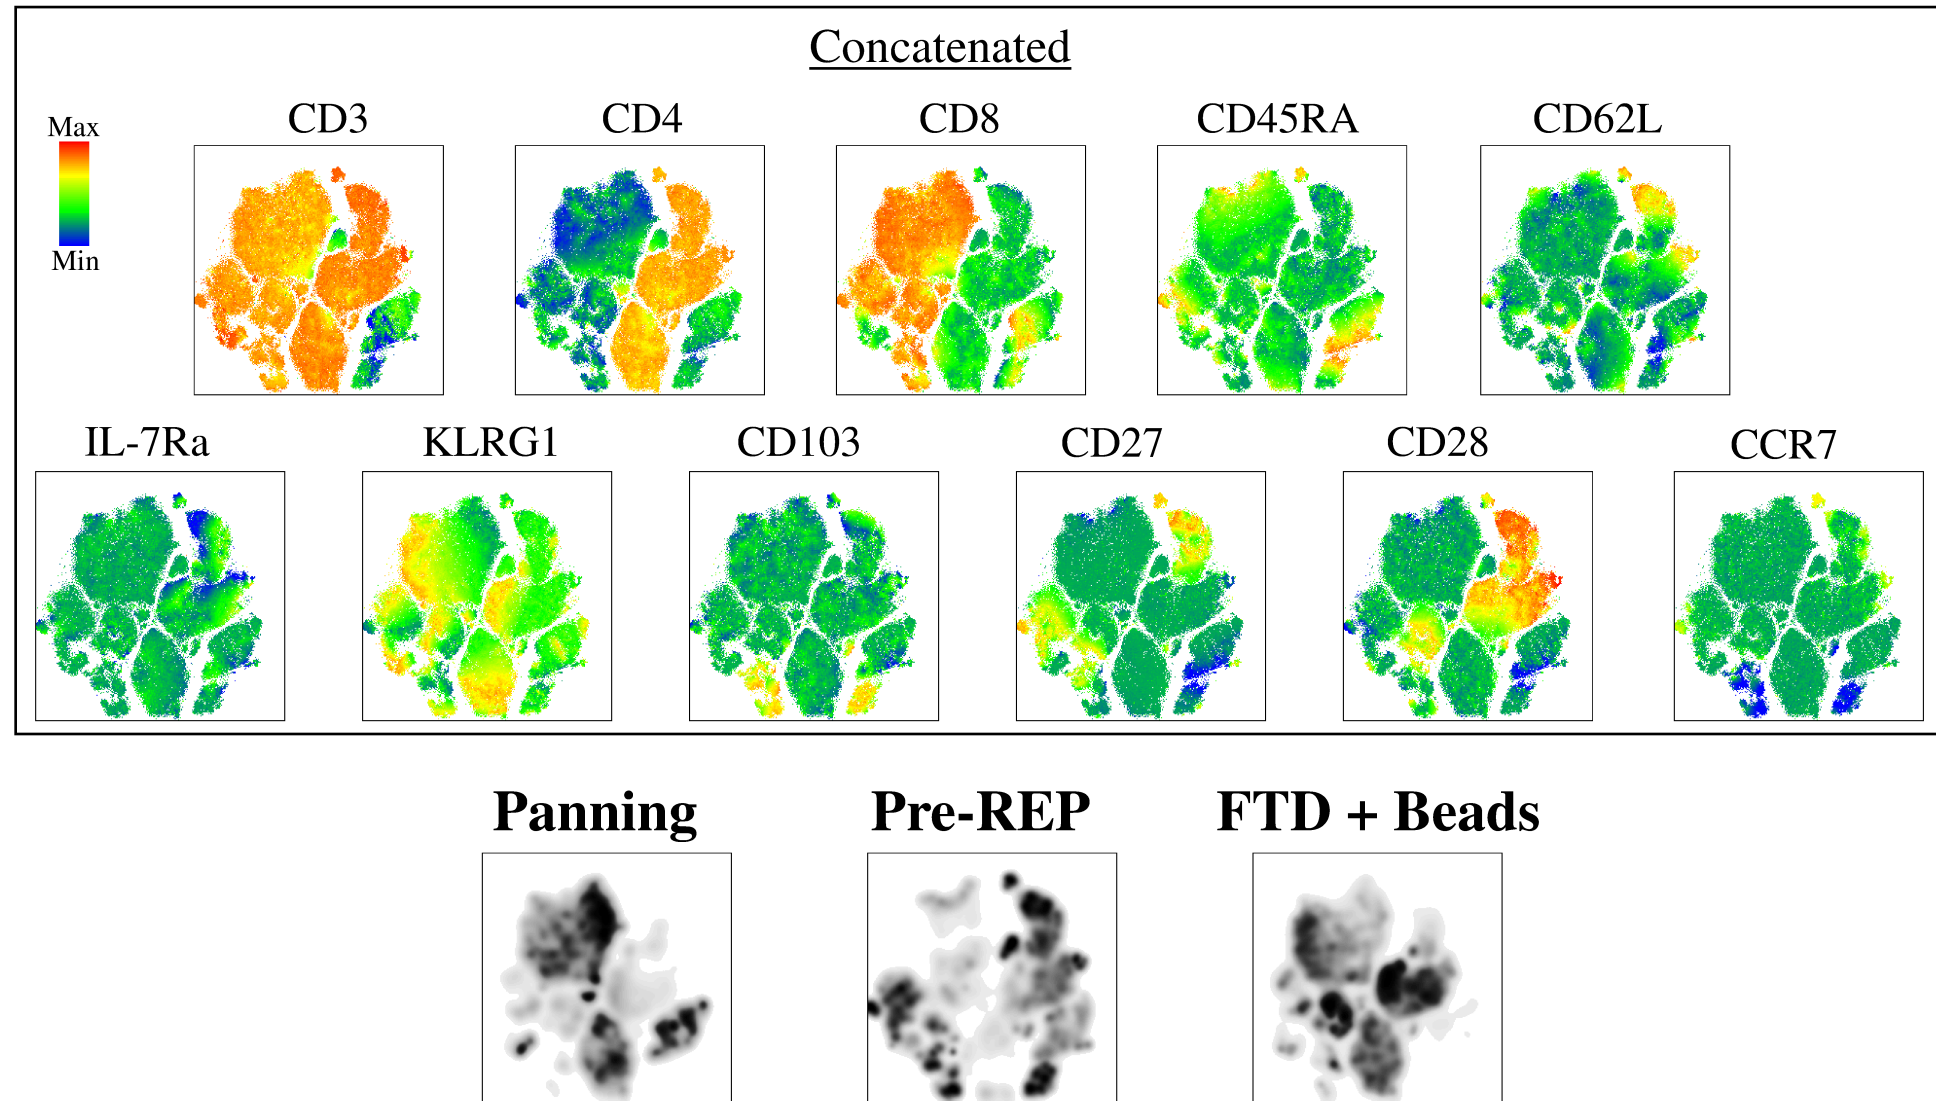



# Supplemental Figure 11 - RCC68

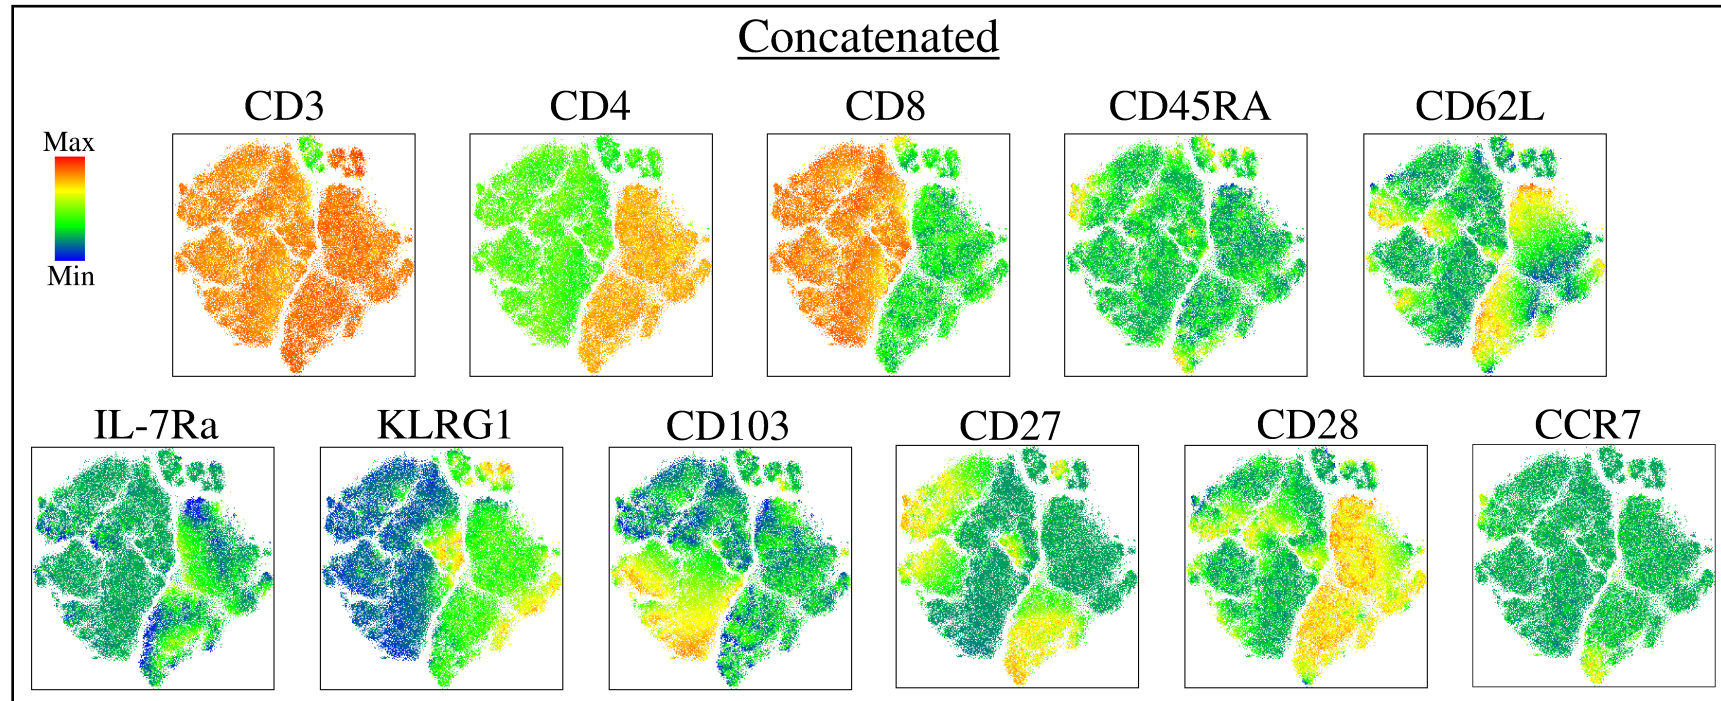

**Panning**

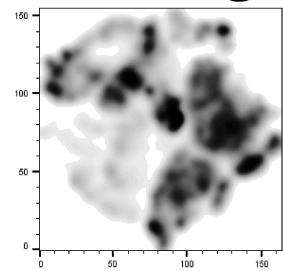

**Pre-REP**

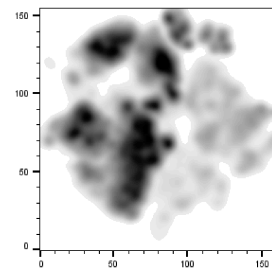

**FTD + Beads**

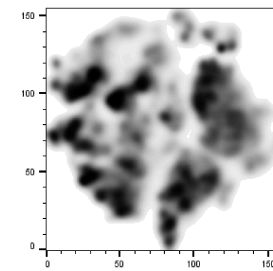

## Supplemental Figure 12 - RCC69

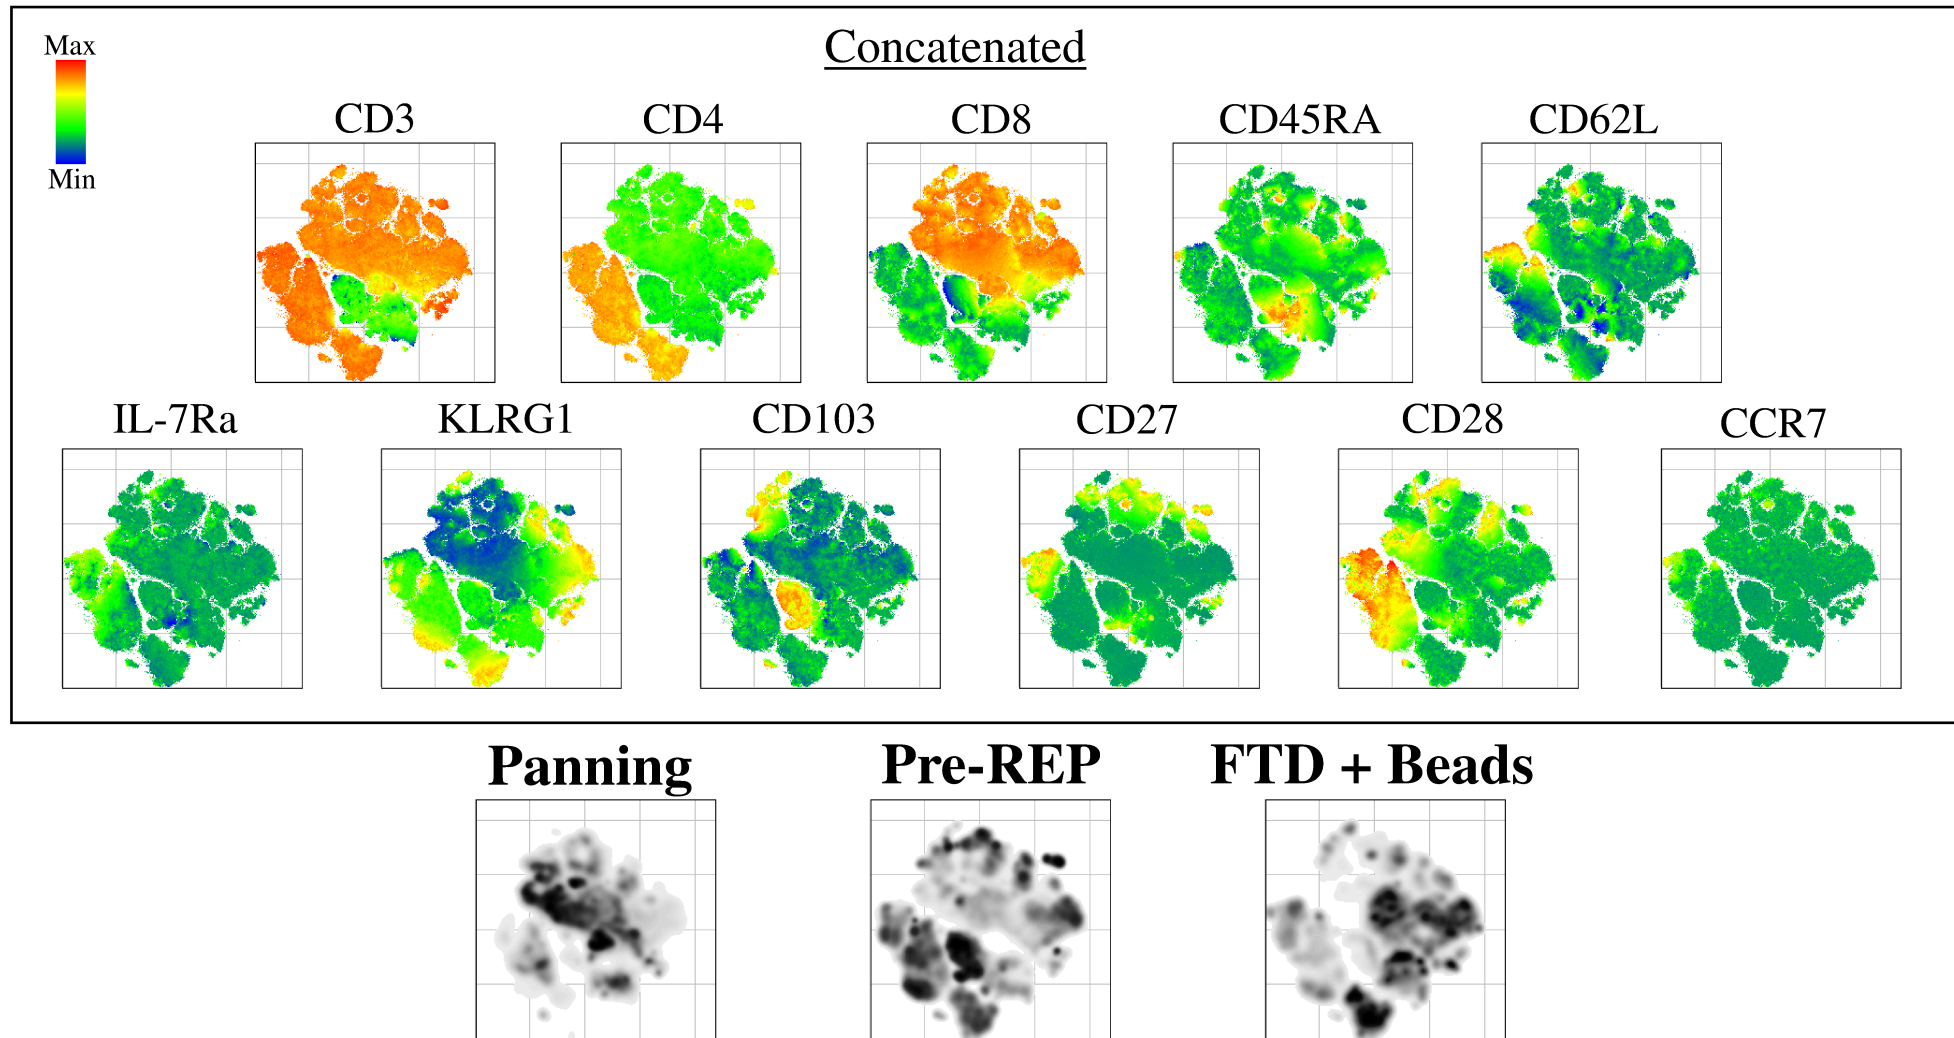

## Supplemental Figure 13

A

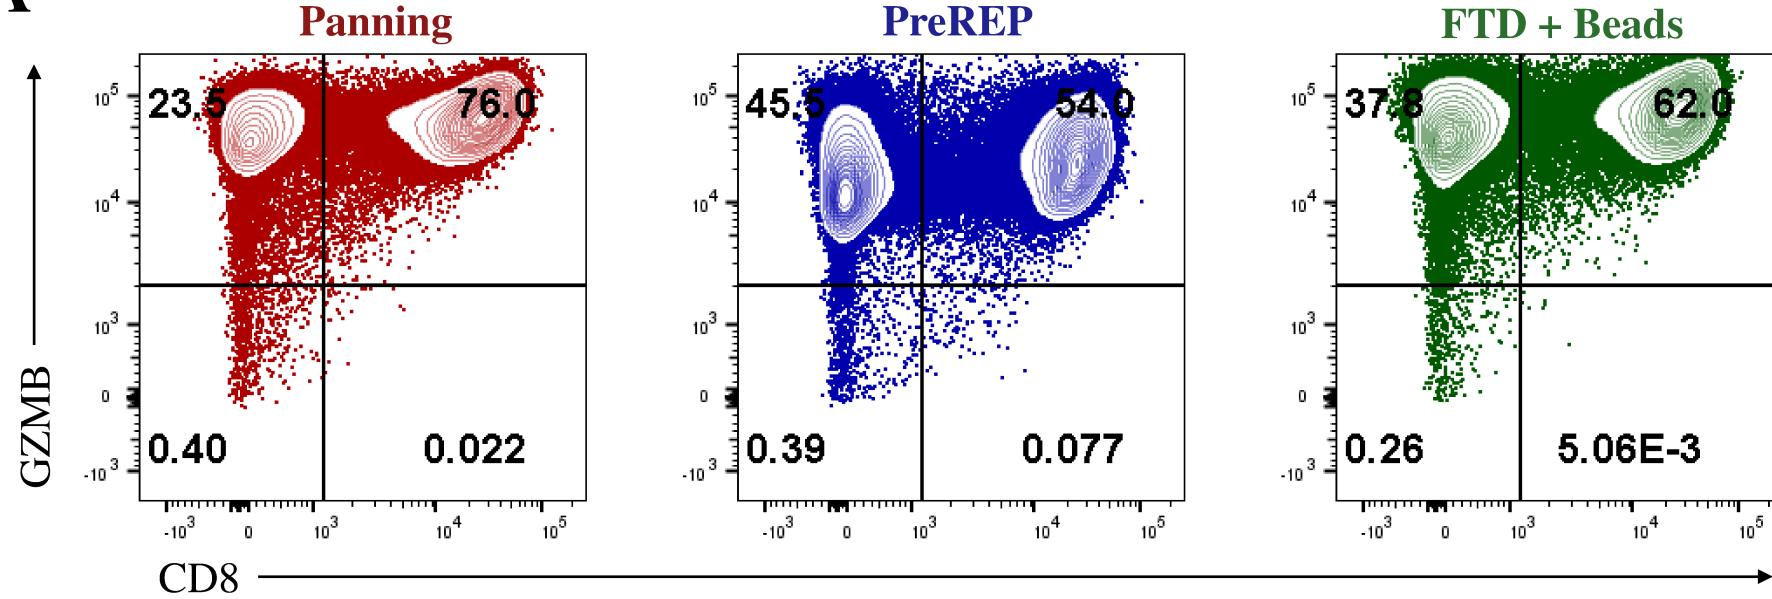

B

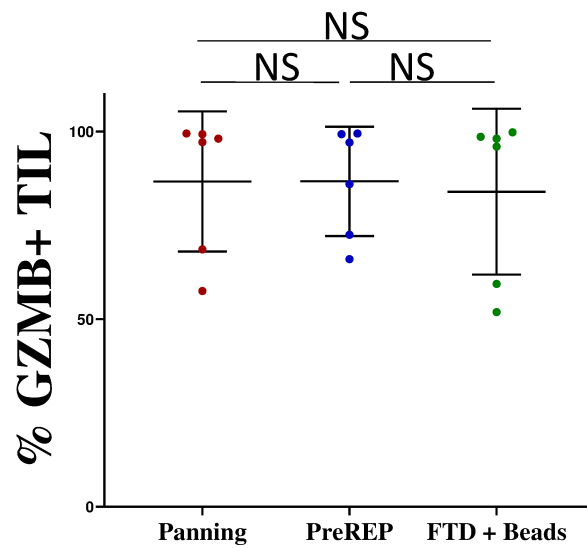

## Supplemental Figure 14

A

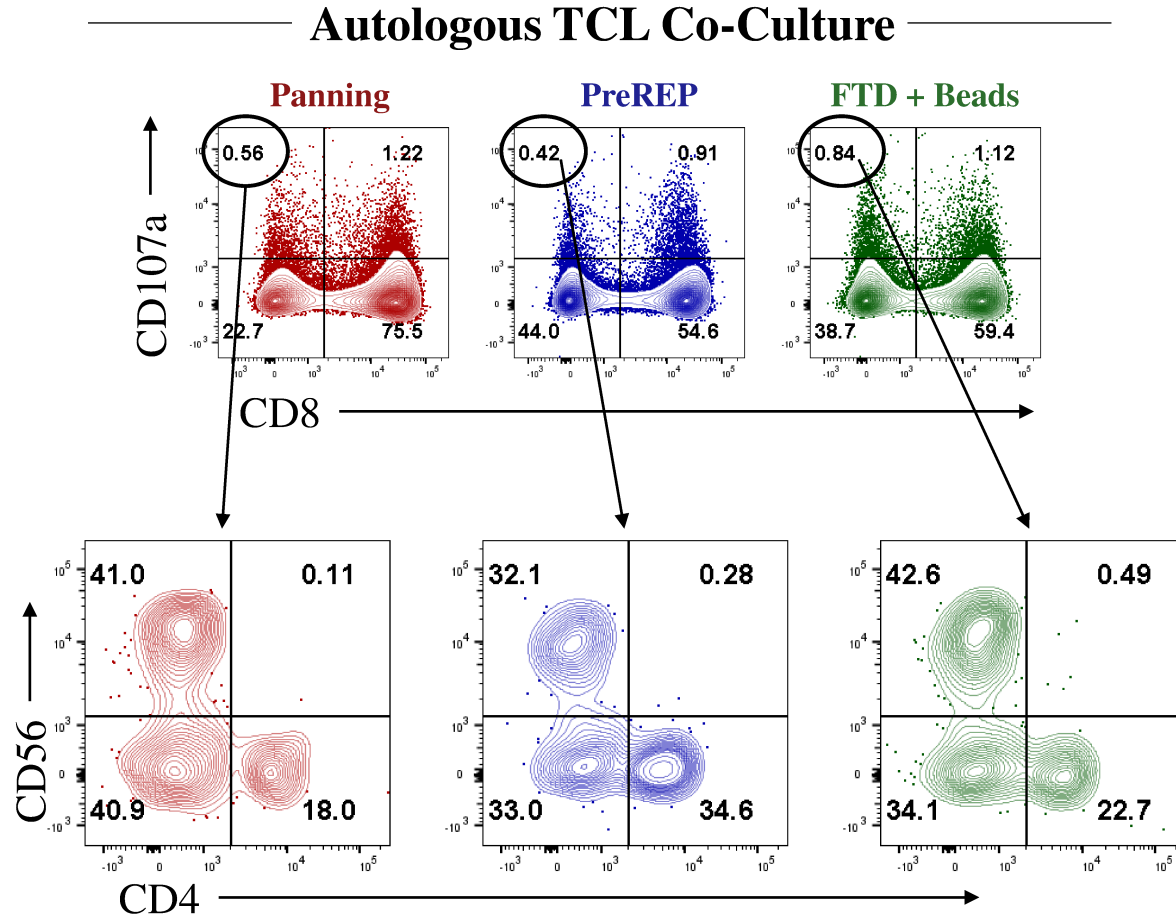

B

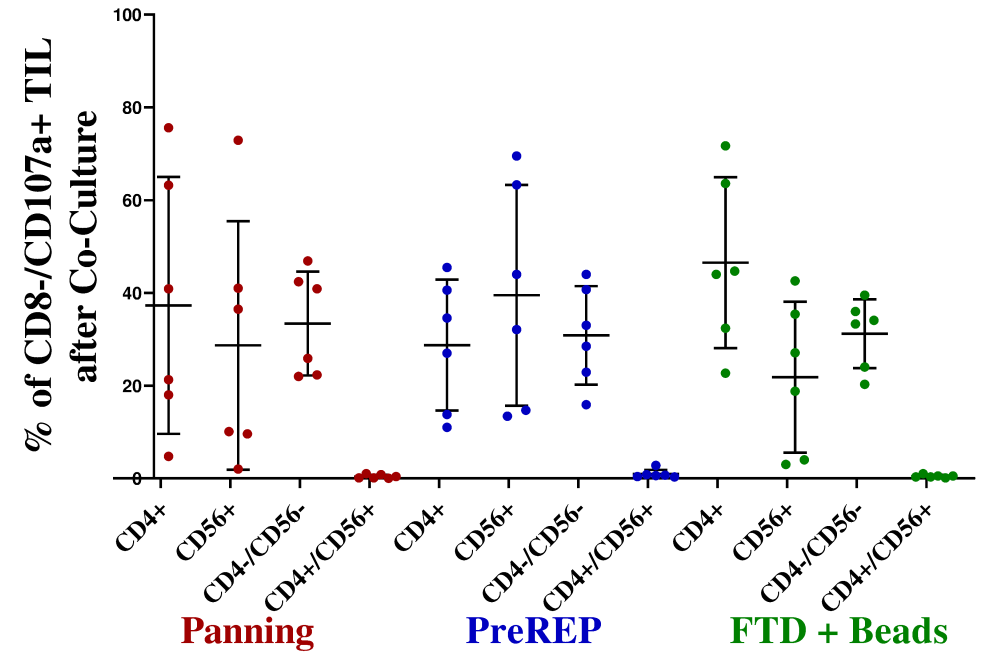

## Supplemental Figure 15

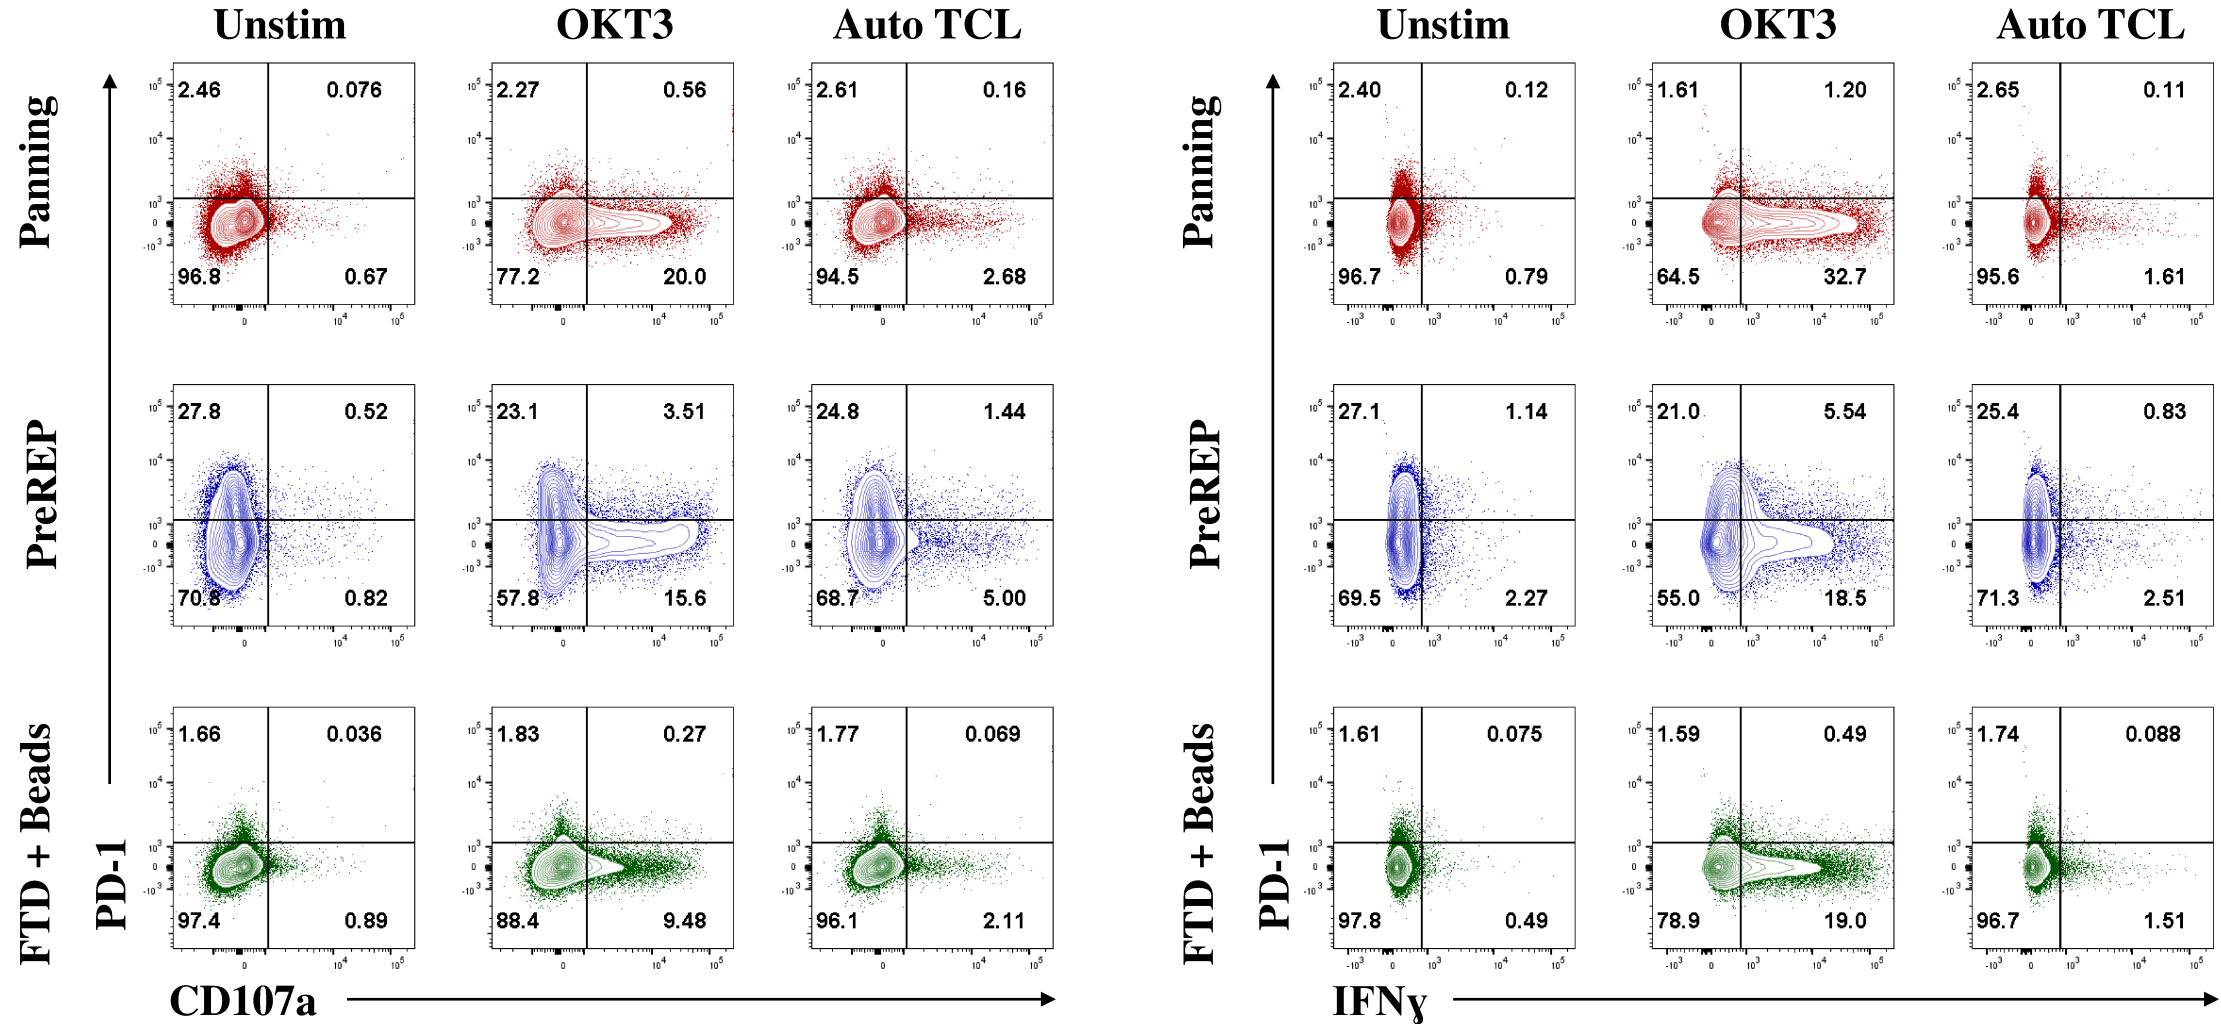

Supplement: jitc-2020-000706supp002.pdf [file jitc-2020-000706supp002.pdf]
